# Supplementary material for: Anthracene and pyrene appended Schiff bases having a ( N , N ) donor for the synthesis of highly stable colloidal silver nano-particles: application in selective sensing and nitroarene reduction
Source: Royal Society of Chemistry journal article supplement (doi:10.1039/d5nj00754b), 2025-01-01
Supplement: d5nj00754b1.pdf [file d5nj00754b1.pdf]

## **Anthracene and pyrene appended Schiff bases having (N,N) donor for the synthesis of highly stable colloidal silver nano-particles: Application in selective sensing and nitroarene reduction**

Nisha Yadav,<sup>a</sup> Annu Rathee,<sup>a</sup> Shreya Sachdeva,<sup>a</sup> Bharat Kumar,<sup>b</sup> Jahangeer Ahmed,<sup>c</sup> Monu Verma,<sup>d</sup> Gyandshwar Kumar Rao<sup>\*a</sup>

<sup>a</sup>Department of Chemistry, Biochemistry and Forensic Science, Amity School of Applied Sciences, Amity University Haryana, Manesar, Gurgaon-122413, Haryana, India.

<sup>b</sup>Department of Chemistry, M V College Buxar, (A constituent unit of Veer Kunwar Singh University Arrah) Bihar-802101, India.

<sup>c</sup>Department of Chemistry, College of Science, King Saud University, P.O. Box 2455, Riyadh 11451, Saudi Arabia. Water-Energy Nexus Laboratory, Department of Environmental Engineering, University of Seoul, Seoul, 02504, South Korea.

\*[gyan23iitd@gmail.com](mailto:gyan23iitd@gmail.com), [gk Rao@ggn.amity.edu](mailto:gk Rao@ggn.amity.edu)

### **NMR Data of Ligands**

**L1:** Yield: 0.395 g (90%); NMR: (<sup>1</sup>H, 500 MHz, CDCl<sub>3</sub>, 25 °C, TMS):  $\delta$  (ppm): 9.52 (s, 2H); 8.49 (s, 2H); 8.44 (d, 4H,  $J$  = 10 Hz); 7.98 (d, 4H,  $J$  = 10 Hz); 7.38 (t, 4H,  $J$  = 10 Hz); 7.17-7.12 (m, 4H); 4.54 (s, 4H). <sup>13</sup>C{<sup>1</sup>H}, 125 MHz, CDCl<sub>3</sub>, 25 °C, TMS):  $\delta$  (ppm): 159.8, 130.7, 129.6, 129.0, 128.0, 127.5, 126.1, 125.0, 124.2, 62.9. IR (cm<sup>-1</sup>) **L1:** 3041, 2899, 2325, 1938, 1804, 1635, 1513, 1438, 1379, 1252, 1157, 1021, 969, 946, 879, 833, 782, 723.

**L2:** Yield: 0.432 g (88%); NMR: (<sup>1</sup>H, 500 MHz, CDCl<sub>3</sub>, 25 °C, TMS):  $\delta$  (ppm): 9.45 (s, 2H); 8.51 (d, 6H,  $J$  = 10 Hz); 8.03 (d, 5H,  $J$  = 5 Hz); 7.55-7.48 (m, 9H); 4.01 (t, 4H,  $J$  = 5 Hz); 1.75-1.72 (m, 4H). <sup>13</sup>C{<sup>1</sup>H}, 125 MHz, CDCl<sub>3</sub>, 25 °C, TMS):  $\delta$  (ppm): 160.1, 131.3, 129.9, 129.1, 128.8, 128.2, 126.6, 125.2, 124.8, 31.0, 27.4. IR (cm<sup>-1</sup>) **L2:** 3041, 2929, 2840, 1915, 1774, 1631, 1513, 1341, 1386, 1446, 1304, 1252, 1058, 1155, 946, 879, 834, 782, 723.

**L3:** Yield: 0.459 g (87%); NMR: (<sup>1</sup>H, 500 MHz, CDCl<sub>3</sub>, 25 °C, TMS):  $\delta$  (ppm): 9.35 (s, 2H); 8.71 (d, 2H,  $J$  = 10 Hz); 8.54 (d, 2H,  $J$  = 10 Hz); 8.33-7.87 (m, 14H); 7.81 (d, 2H,  $J$  = 5 Hz); 4.38 (s, 4H). (<sup>13</sup>C{<sup>1</sup>H}, 125 MHz, CDCl<sub>3</sub>, 25 °C, TMS):  $\delta$  (ppm): 162.1, 132.8, 131.1, 130.4, 129.8, 128.7, 128.4, 128.3, 127.3, 126.1, 125.9, 125.7, 125.4, 124.8, 124.7, 124.5, 122.3, 62.4. IR (cm<sup>-1</sup>) **L3:** 3041, 2907, 2840, 1908, 1781, 1677, 1625, 1595, 1535, 1505, 1483, 1453, 1431, 1408, 1386, 1319, 1282, 1237, 1177, 1088, 1051, 1013, 986, 894, 745, 715, 685.

**L4:** Yield: 0.445 g (82%); NMR: ( $^1\text{H}$ , 500 MHz,  $\text{CDCl}_3$ , 25 °C, TMS):  $\delta$  (ppm): 9.33 (s, 2H); 8.89 (d, 2H,  $J = 10$  Hz); 8.53 (d, 2H,  $J = 10$  Hz); 8.24–8.01 (m, 14H); 3.90 (t, 4H,  $J = 5$  Hz); 1.96 (t, 4H,  $J = 5$  Hz); 1.65 (m, 4H). ( $^{13}\text{C}\{^1\text{H}\}$ , 125 MHz,  $\text{CDCl}_3$ , 25 °C, TMS):  $\delta$  (ppm): 159.6, 132.8, 131.4, 130.7, 129.8, 129.0, 128.6, 128.5, 127.6, 126.4, 126.2, 125.9, 125.6, 125.1, 125.0, 124.8, 122.8, 62.8, 31.2, 27.4. IR ( $\text{cm}^{-1}$ ) **L4:** 3034, 2922, 2847, 1915, 1781, 1677, 1625, 1595, 1431, 1386, 1356, 1304, 1237, 1177, 1095, 1021, 969, 931, 887, 849, 820, 745, 715, 685.

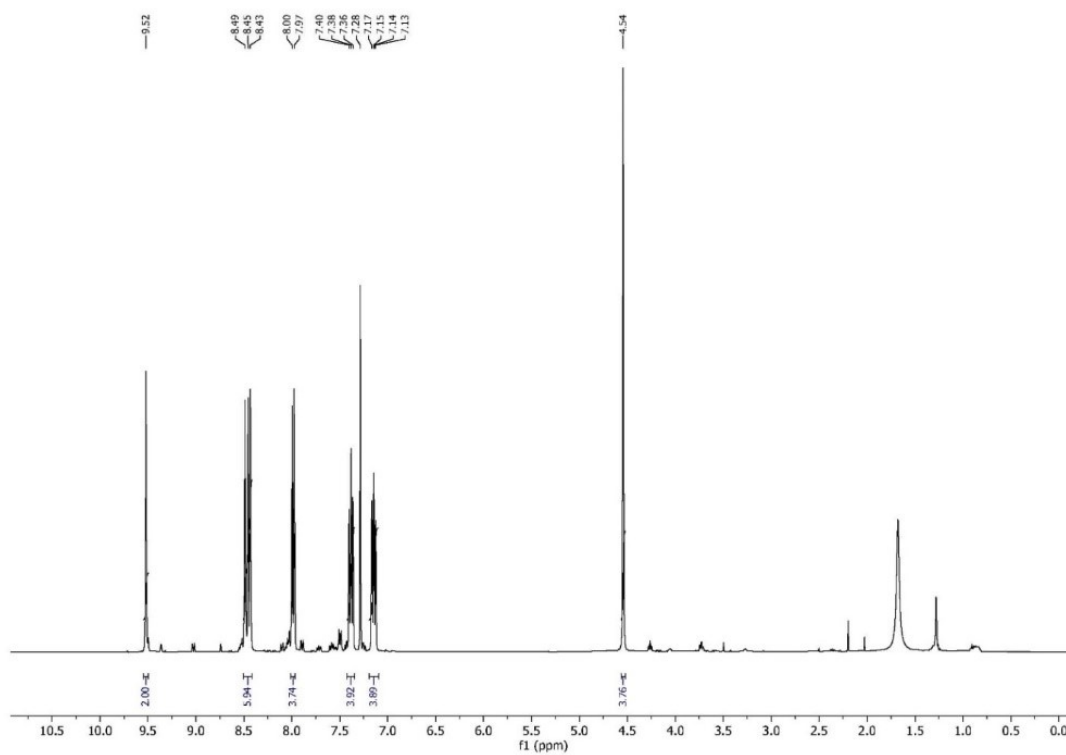

**Figure S1.** <sup>1</sup>H NMR spectra of L1

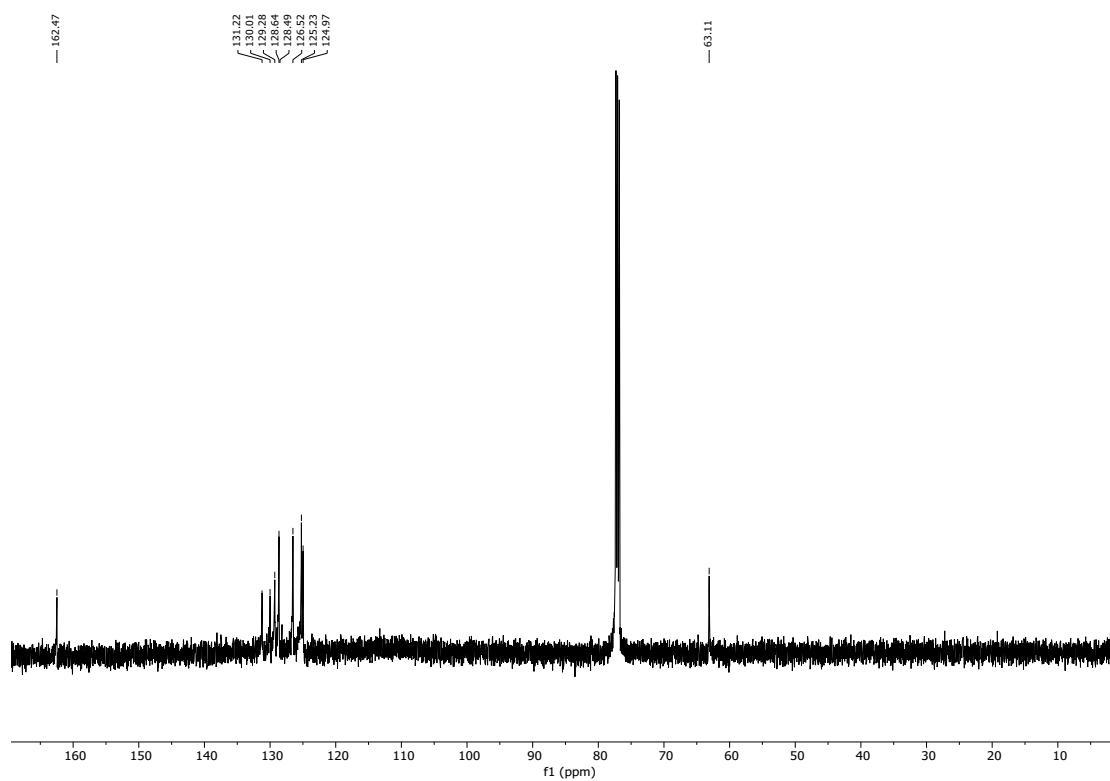

**Figure S2.** <sup>13</sup>C{<sup>1</sup>H} NMR spectra of L1

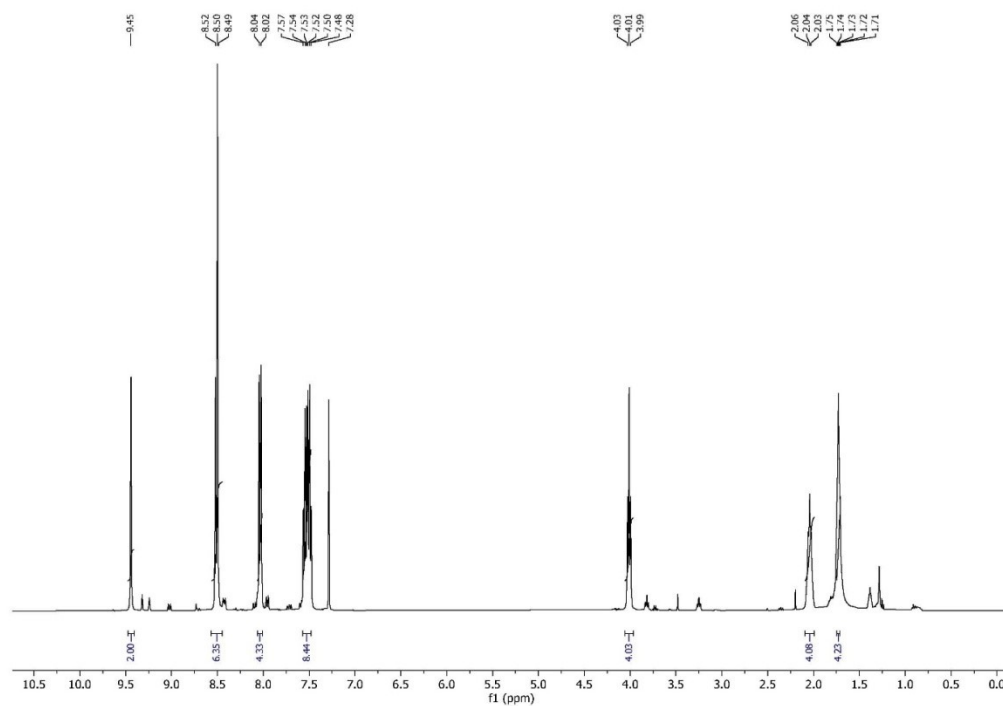

**Figure S3.**  $^1\text{H}$  NMR spectra of L2

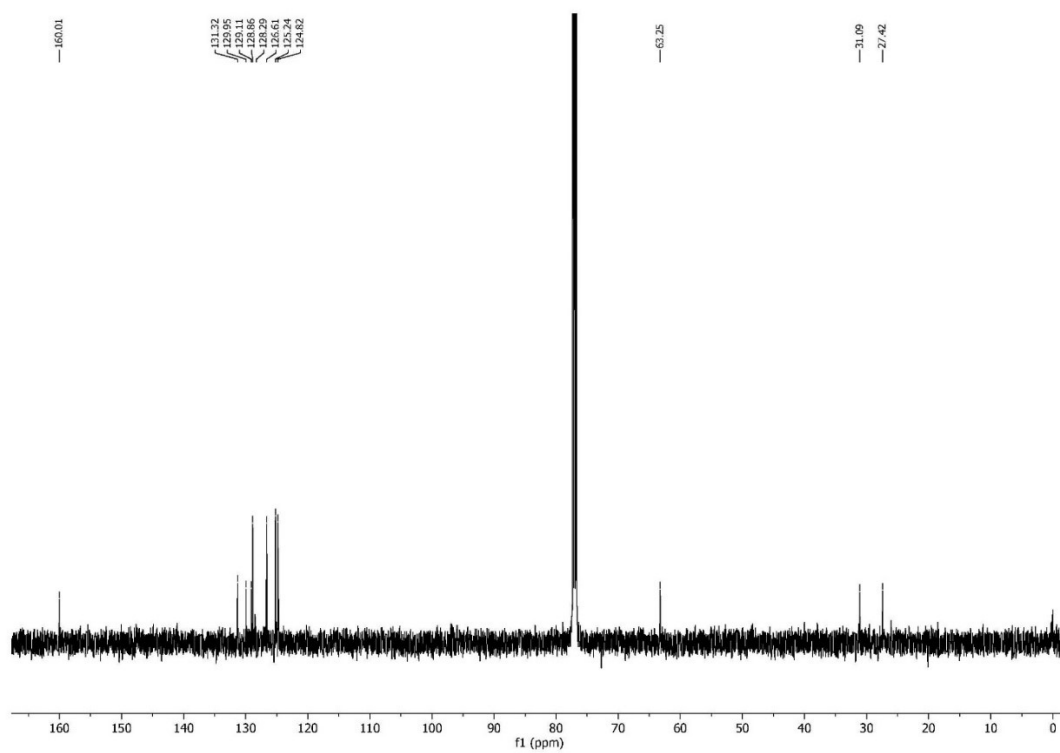

**Figure S4.**  $^{13}\text{C}\{^1\text{H}\}$  NMR spectra of L2



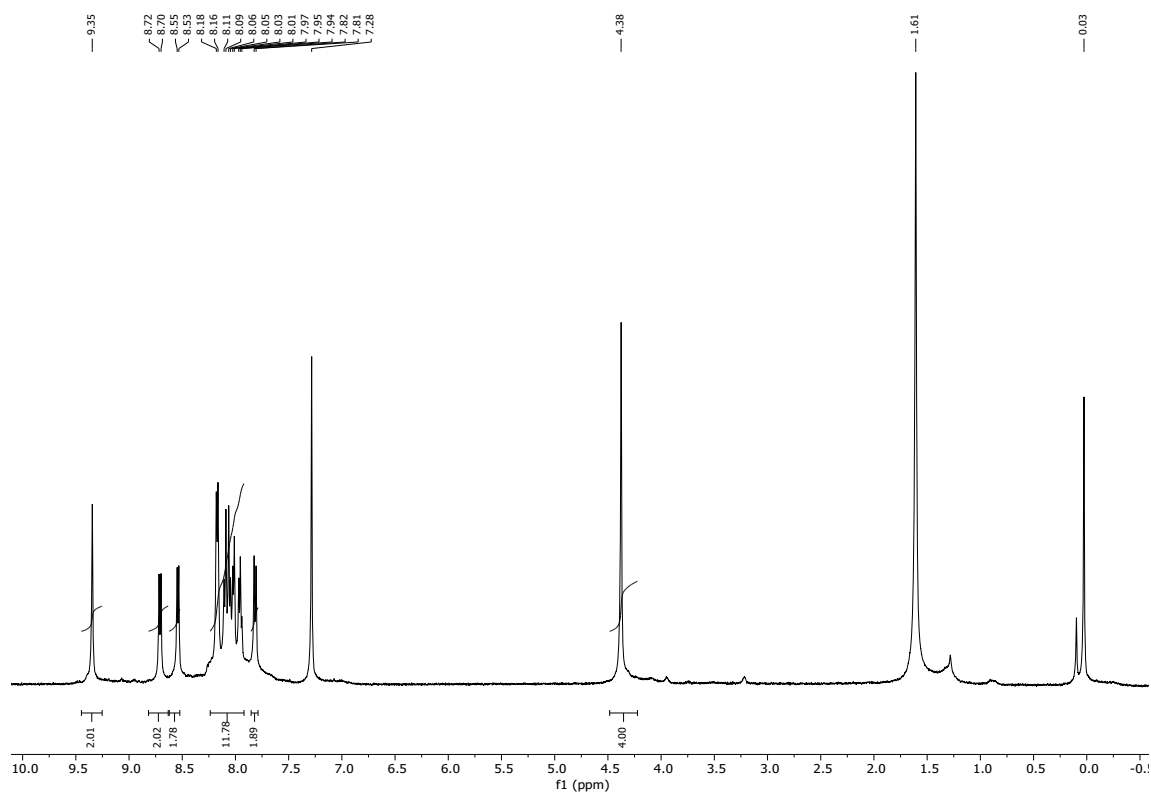

Figure S5.  $^1\text{H}$  NMR spectra of L3

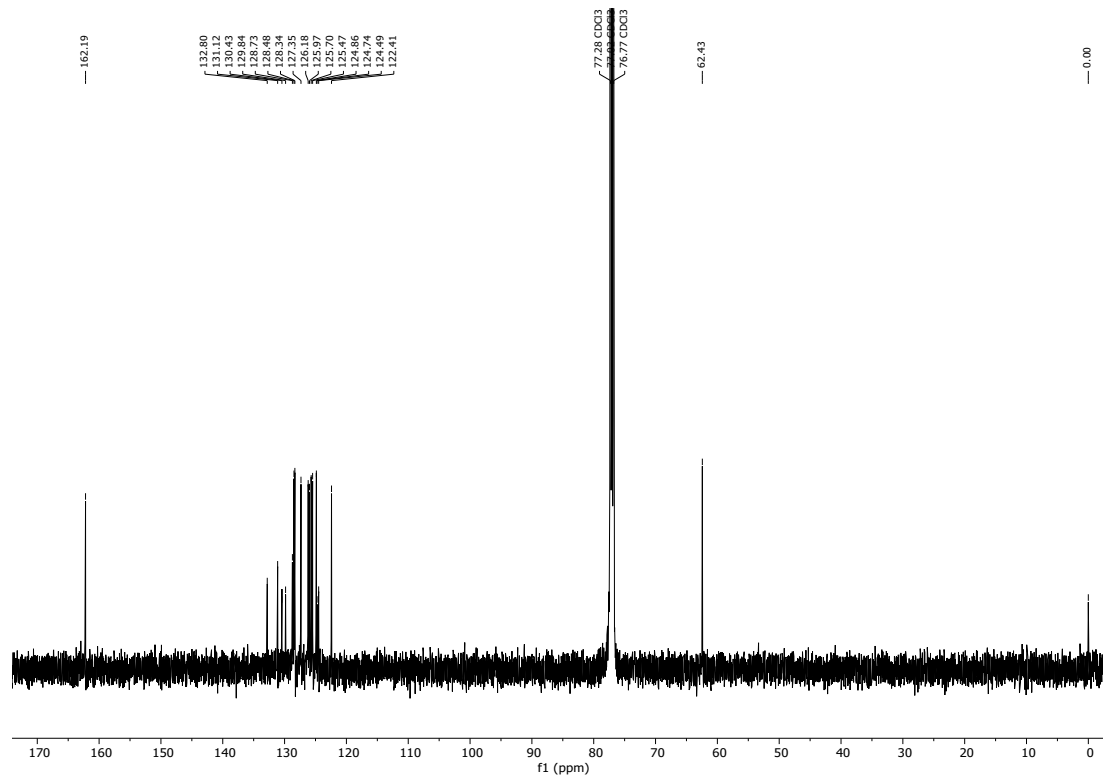

Figure S6.  $^{13}\text{C}\{^1\text{H}\}$  NMR spectra of L3

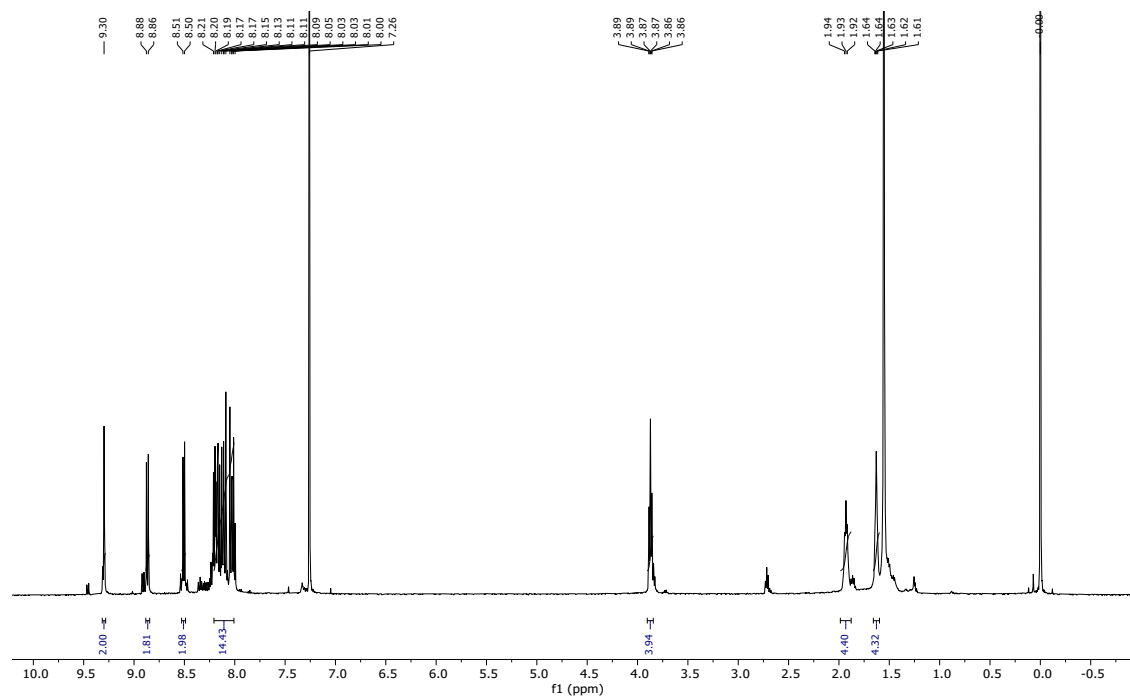

Figure S7. <sup>1</sup>H NMR spectra of L4

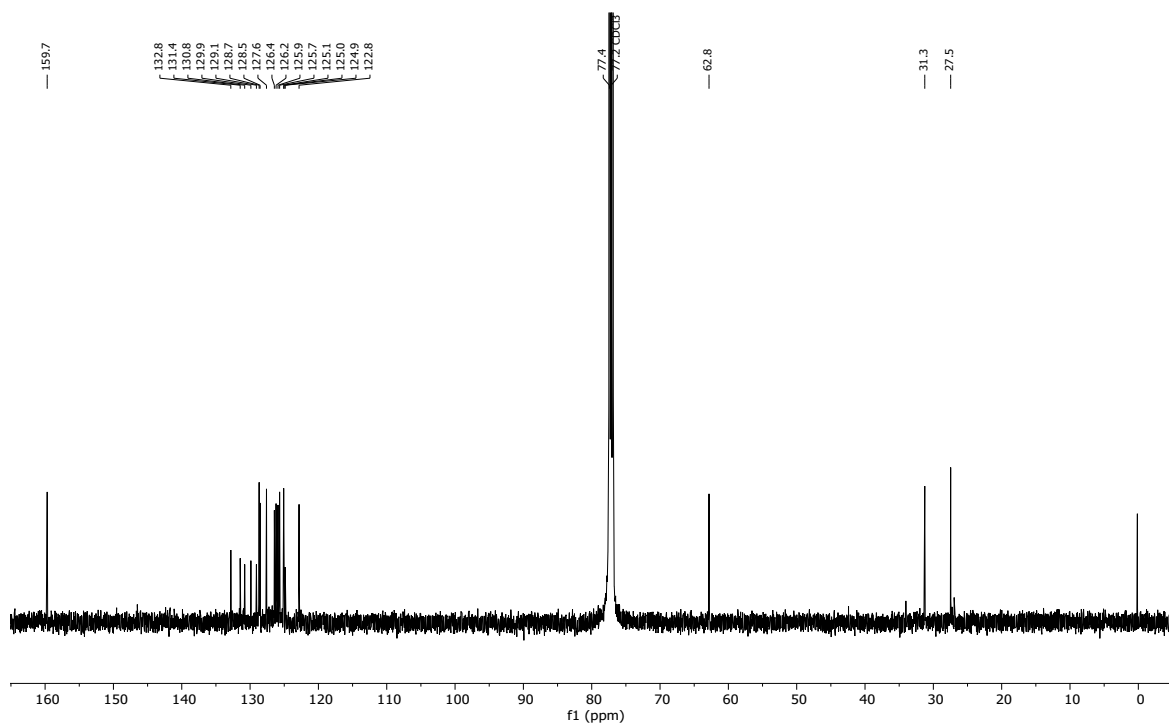

Figure S8. <sup>13</sup>C{<sup>1</sup>H} NMR spectra of L4

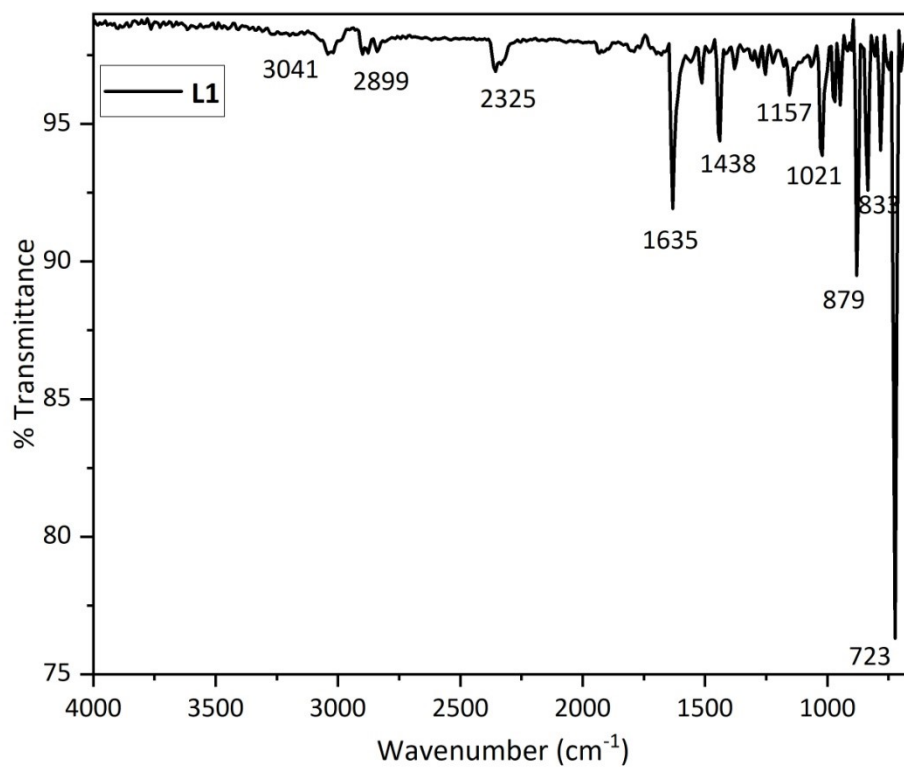

**Figure S9.** Infrared spectra of L1

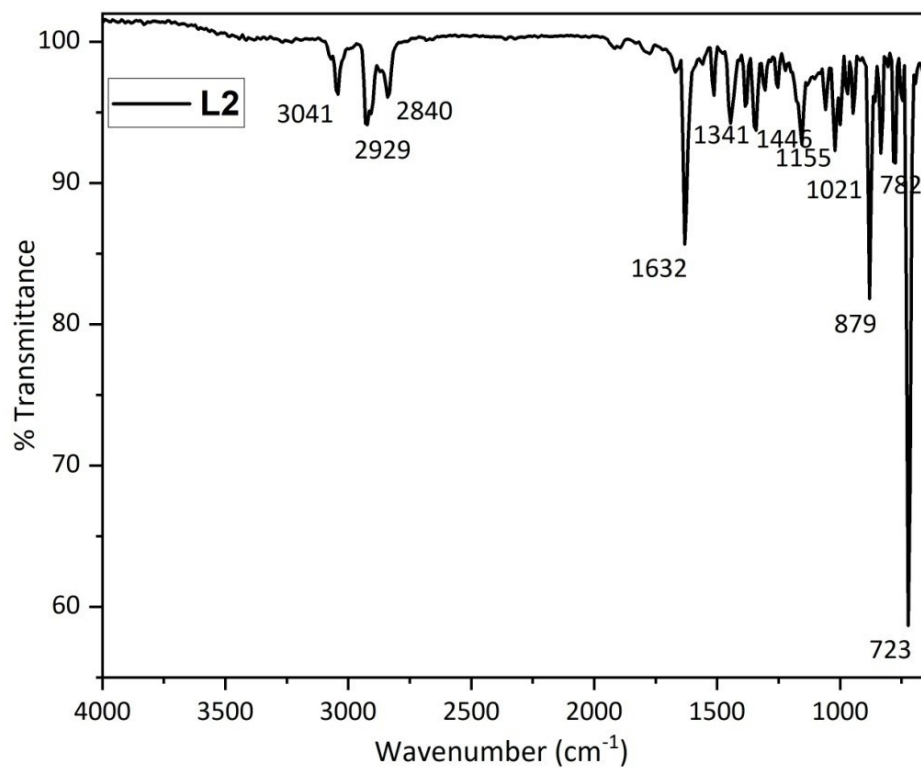

**Figure S10.** Infrared spectra of L2

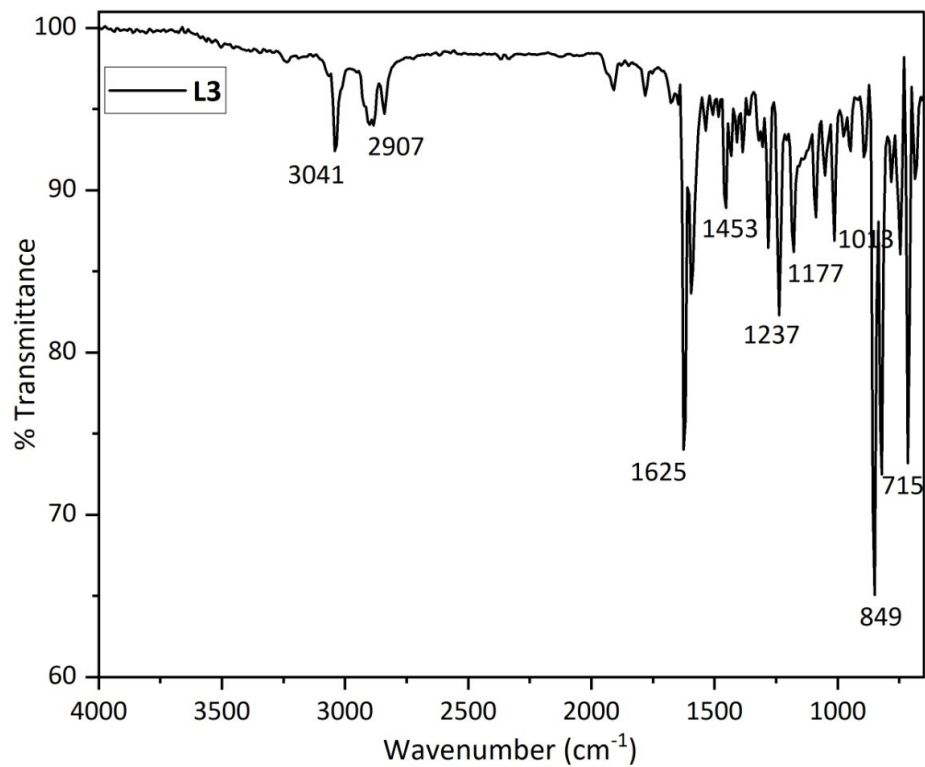

**Figure S11.** Infrared spectra of L3

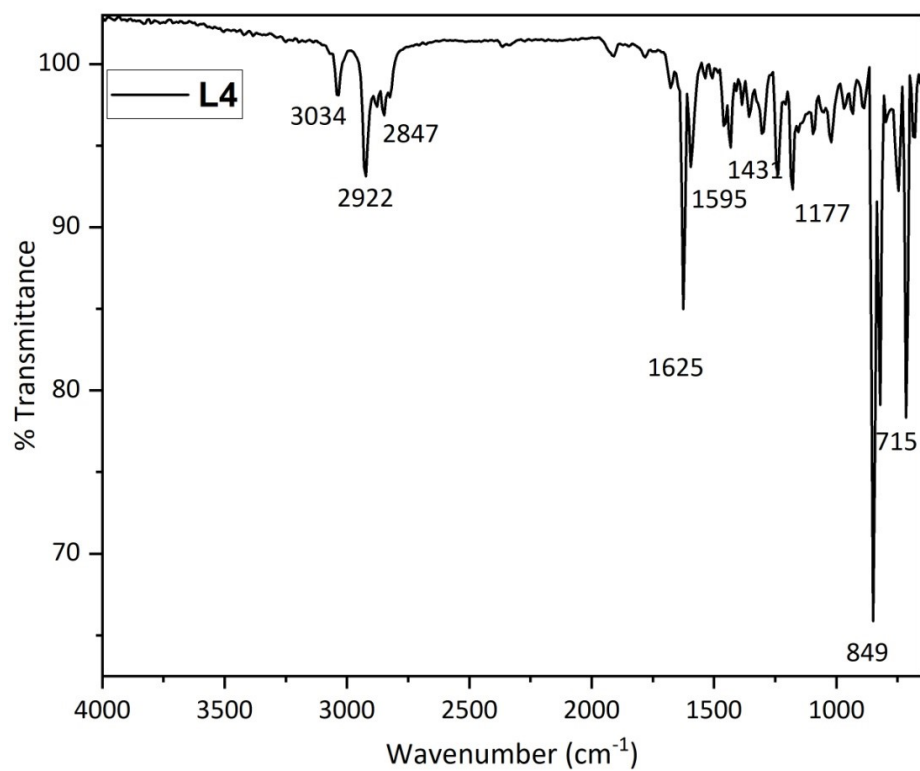

**Figure S12.** Infrared spectra of L4

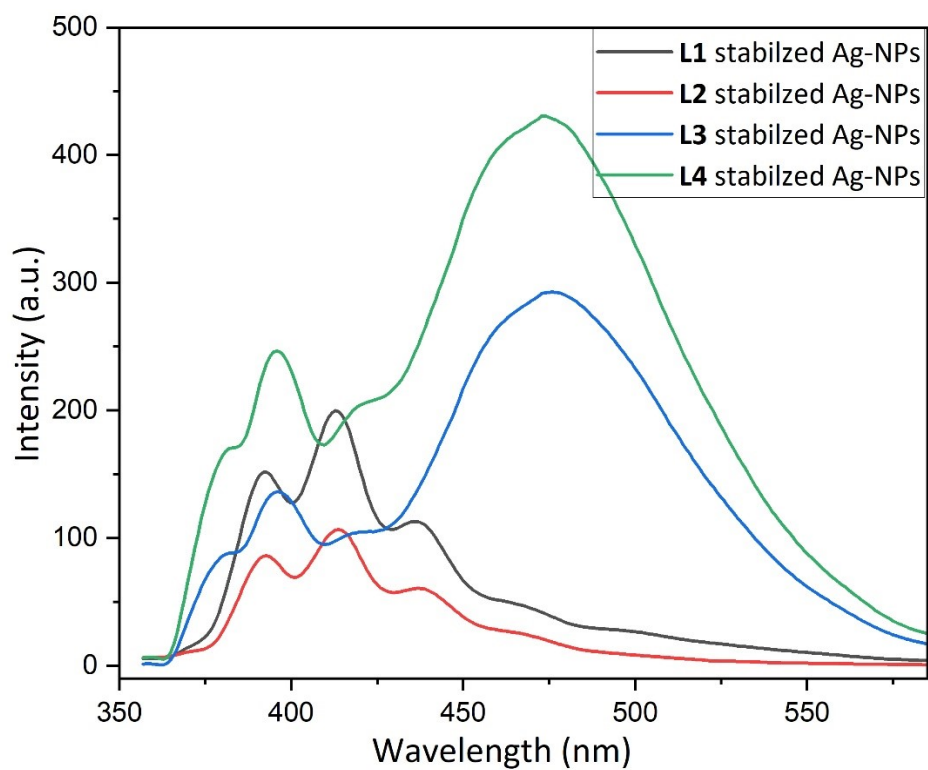

**Figure S13.** Fluorescence spectra of **L1–L4** stabilized silver nanoparticles

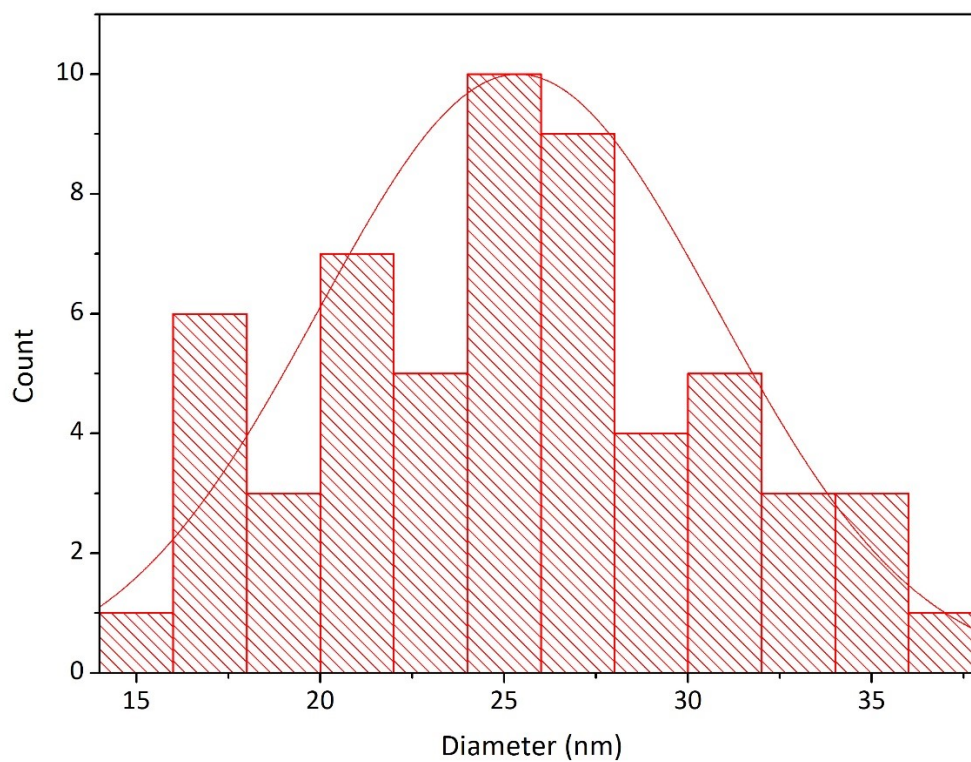

**Figure S14.** Particle size distribution in the case of **L1** stabilized silver nanoparticles

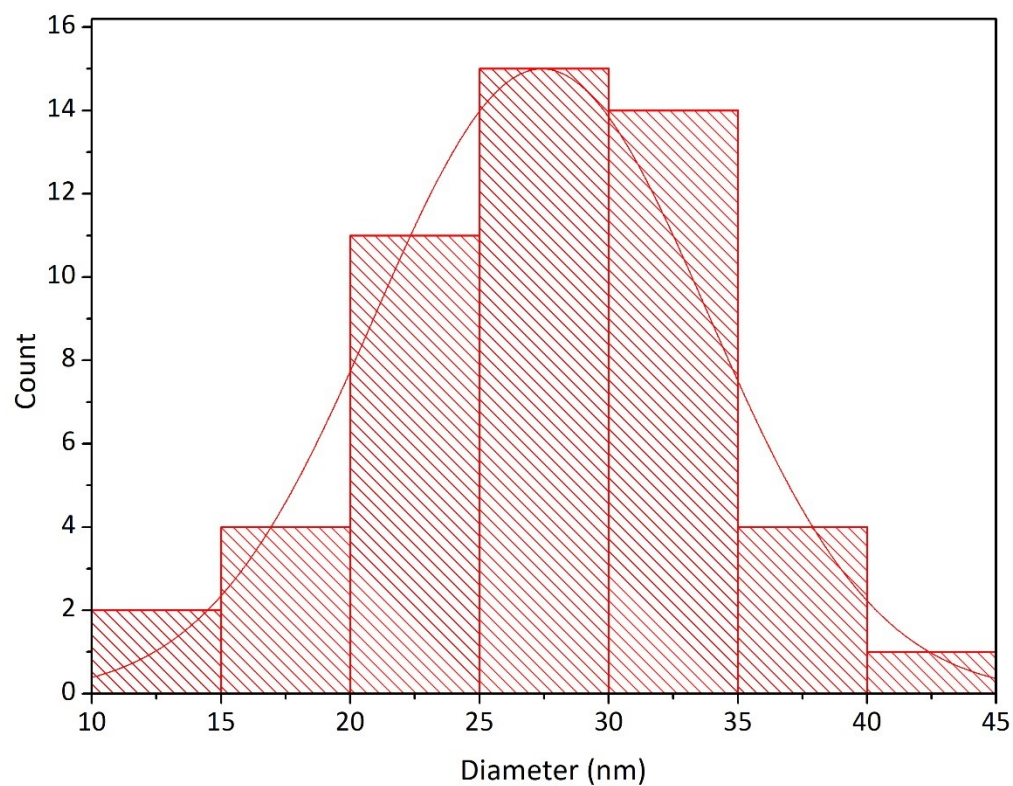

**Figure S15.** Particle size distribution in the case of **L2** stabilized silver nanoparticles

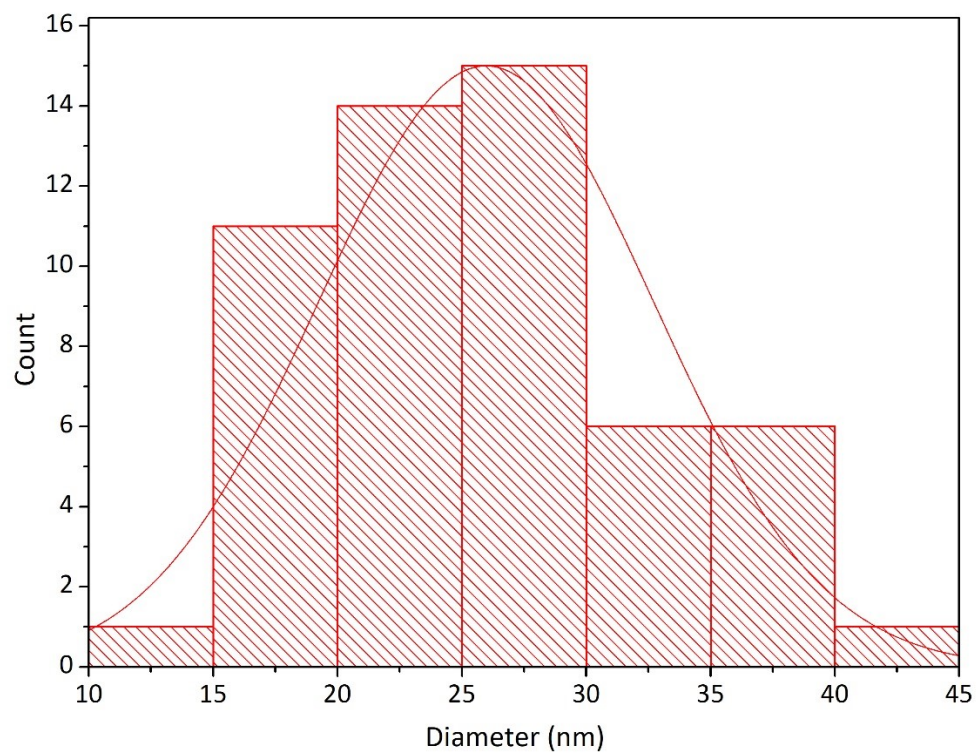

**Figure S16.** Particle size distribution in the case of **L3** stabilized silver nanoparticles



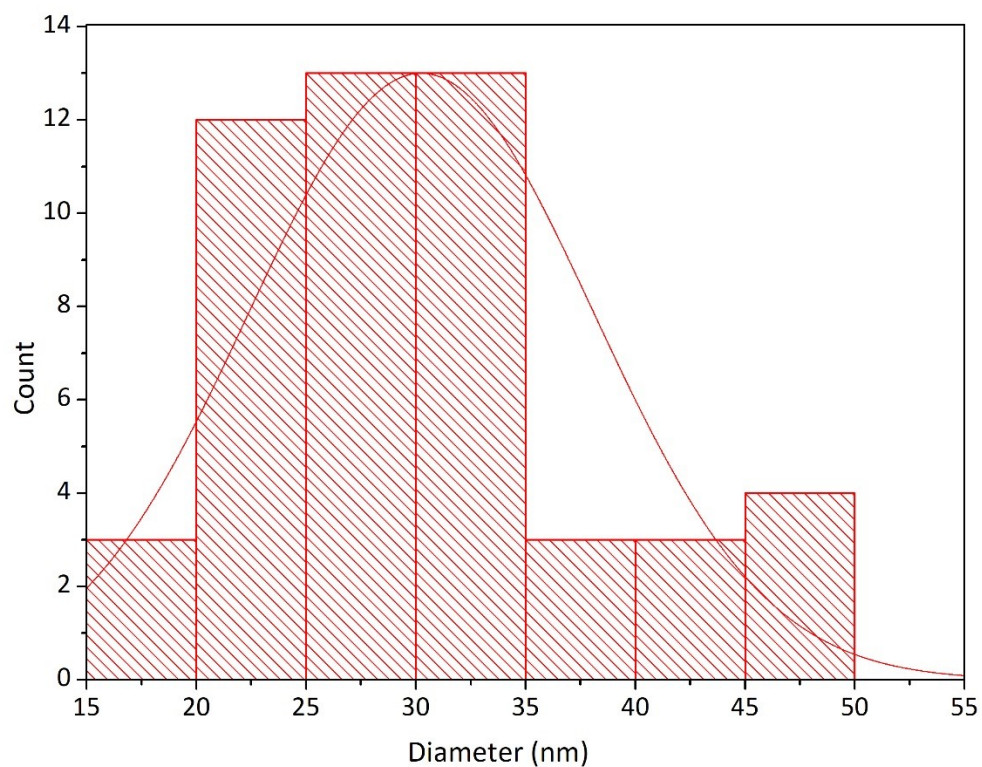

**Figure S17.** Particle size distribution in the case of **L4** stabilized silver nanoparticles

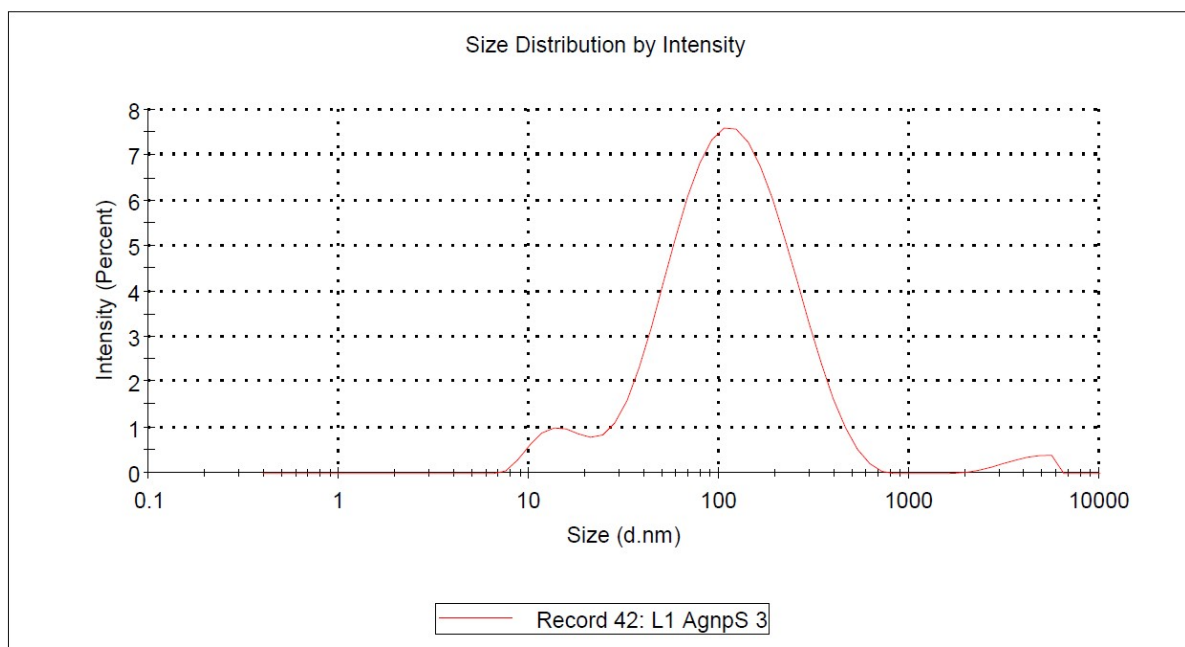

**Figure S18.** DLS data of **L1** stabilized silver nanoparticles (freshly synthesized)

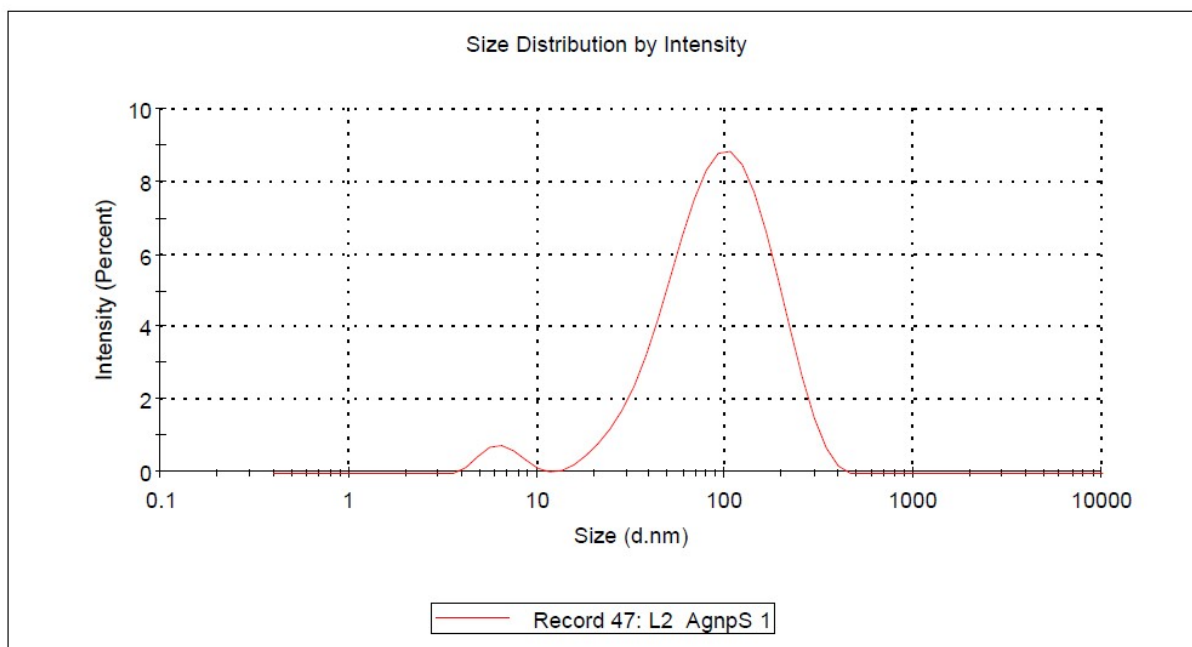

**Figure S19.** DLS data of **L2** stabilized silver nanoparticles (freshly synthesized)

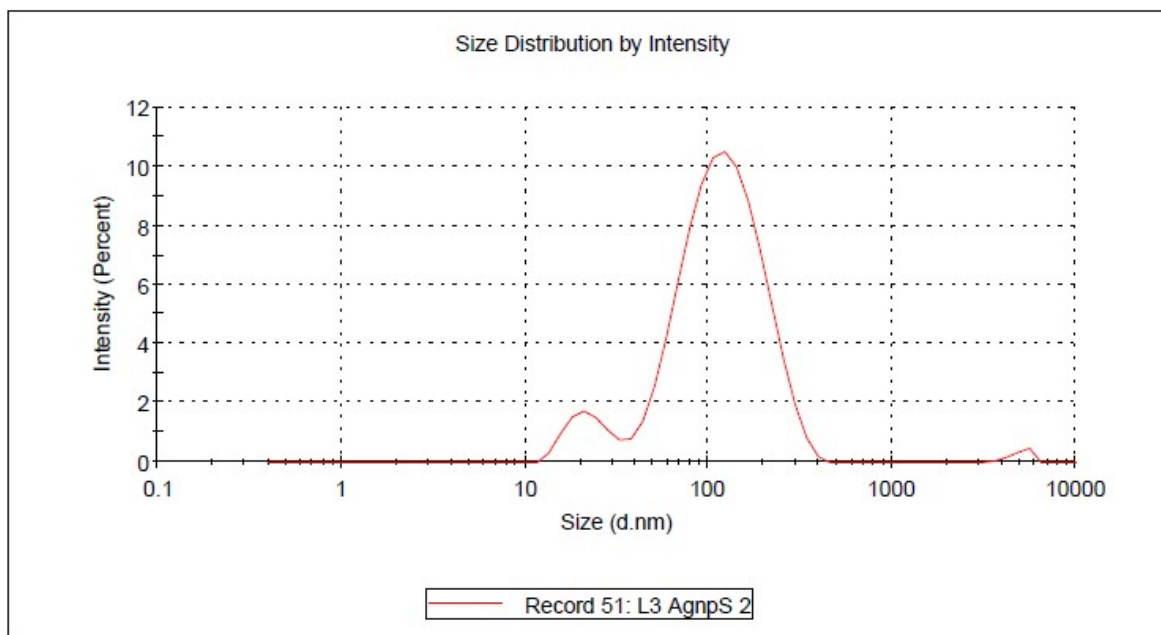

**Figure S20.** DLS data of **L3** stabilized silver nanoparticles (freshly synthesized)



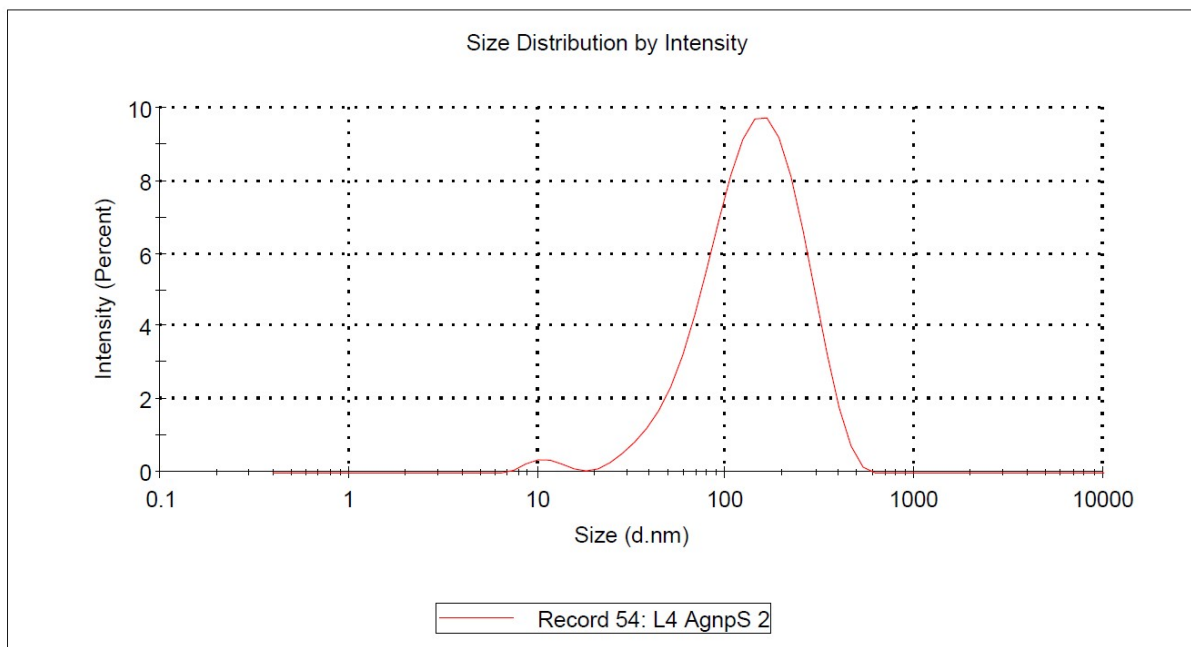

**Figure S21.** DLS data of **L4** stabilized silver nanoparticles (freshly synthesized)

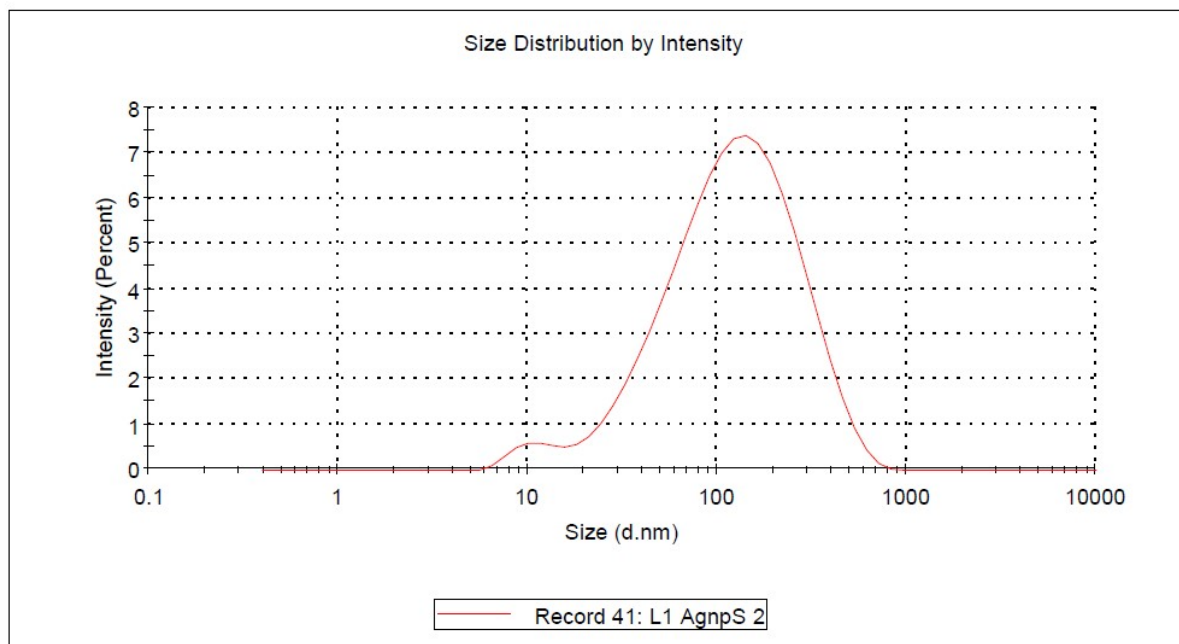

**Figure S22.** DLS data of **L1** stabilized silver nanoparticles (at 15<sup>th</sup> day)

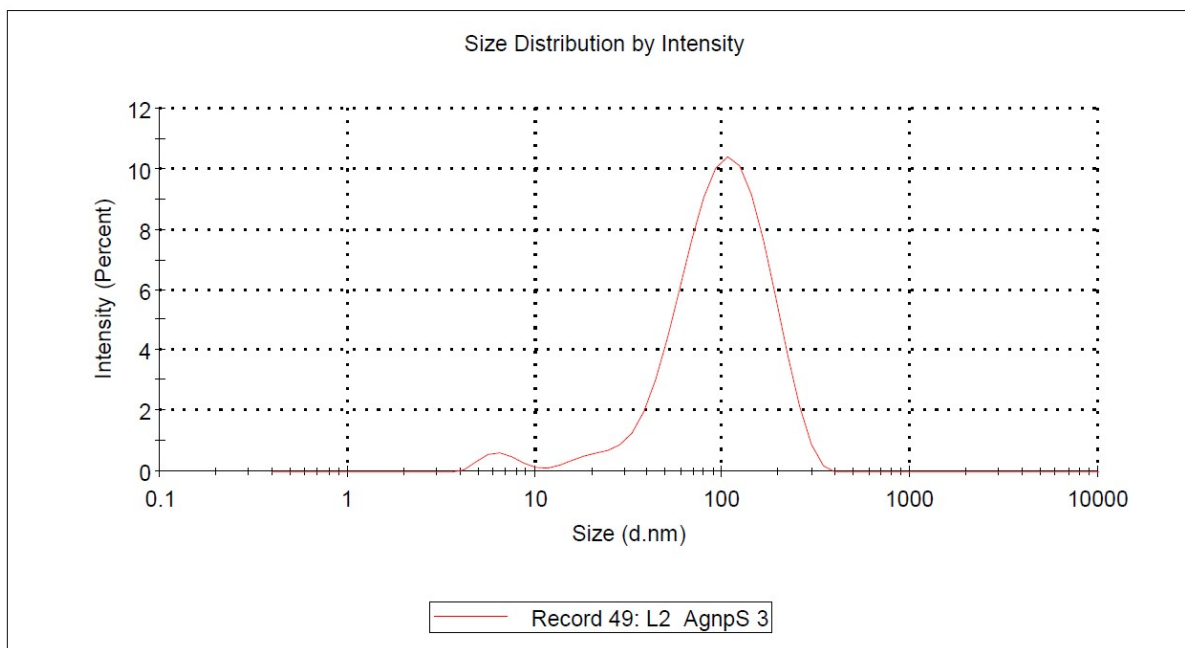

**Figure S23.** DLS data of **L2** stabilized silver nanoparticles (at 15<sup>th</sup> day)

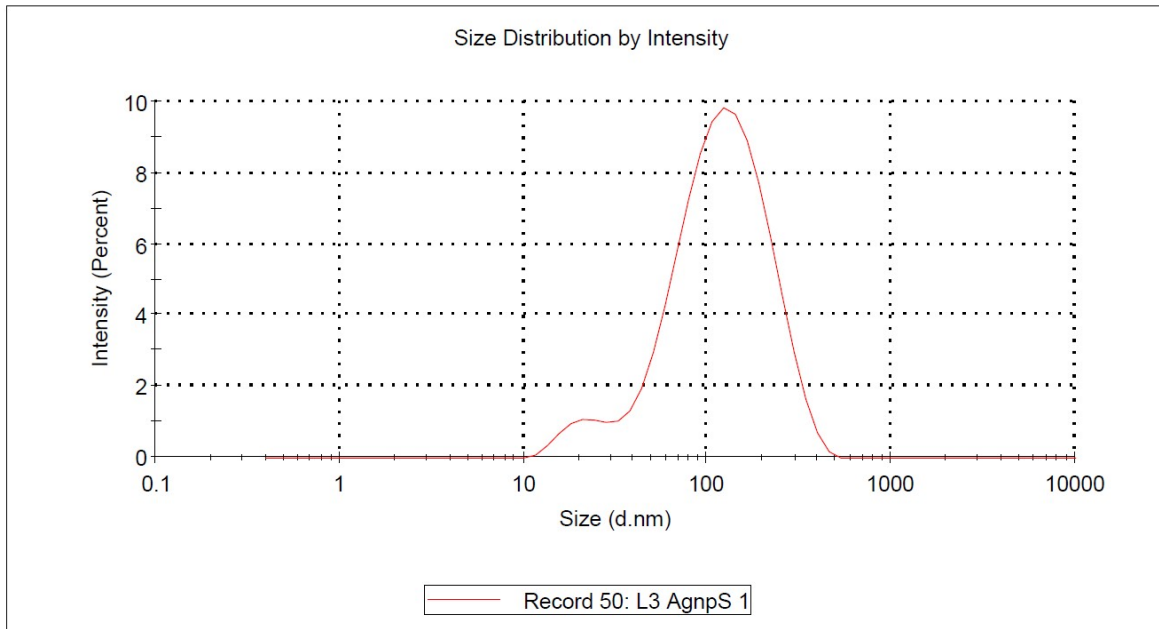

**Figure S24.** DLS data of **L3** stabilized silver nanoparticles (at 15<sup>th</sup> day)

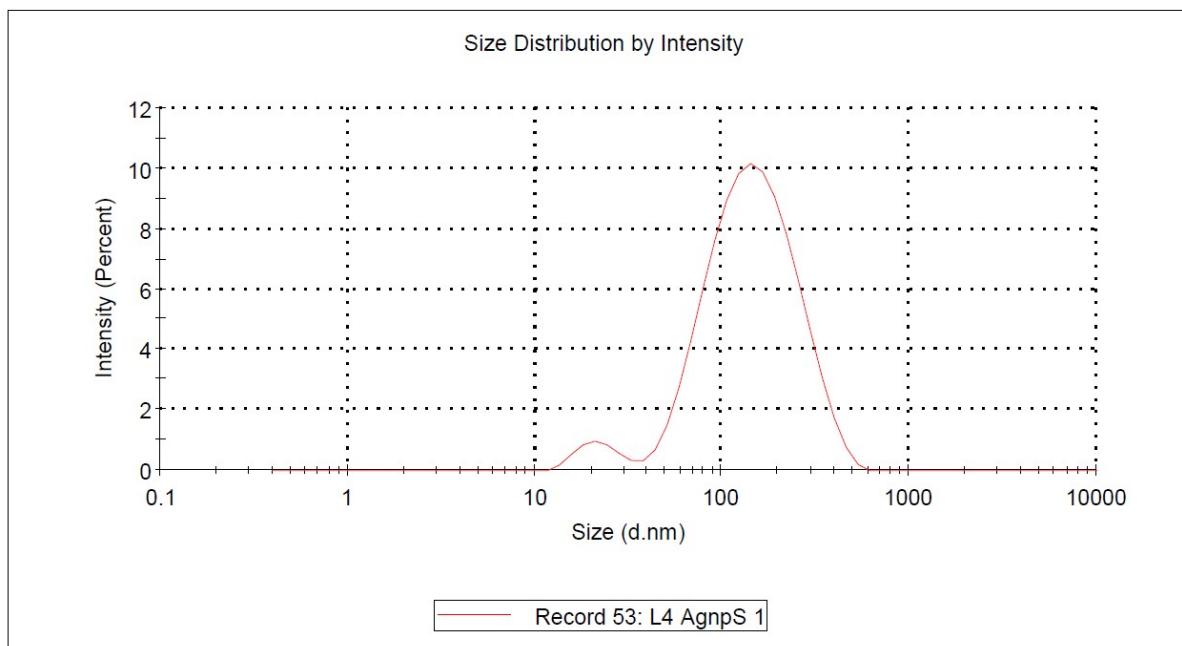

**Figure S25.** DLS data of **L4** stabilized silver nanoparticles (at 15<sup>th</sup> day)

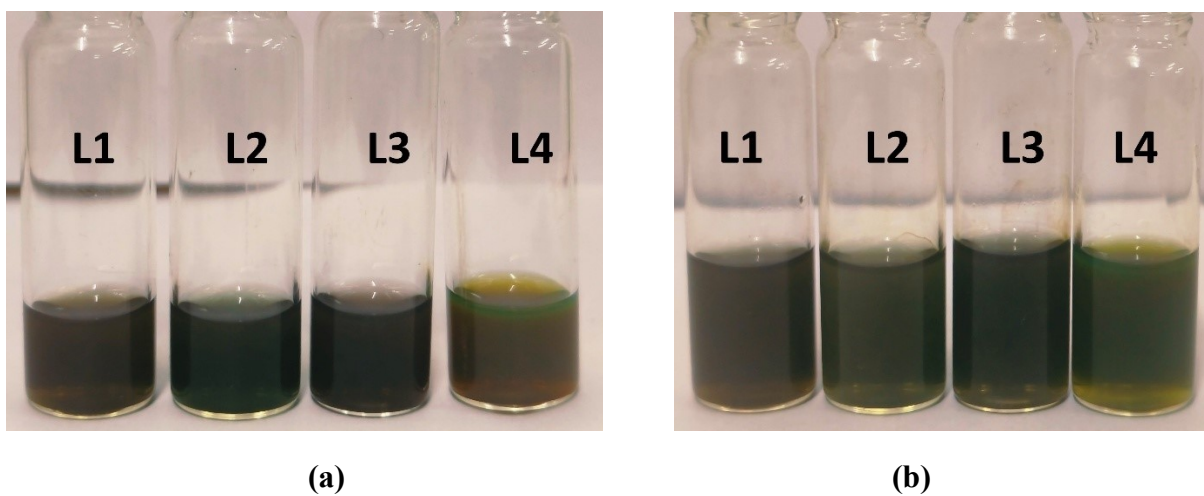

**Figure S26.** Photographs of; (a) as-synthesized colloidal Ag-NPs and (b) colloidal Ag-NPs at 60<sup>th</sup> day

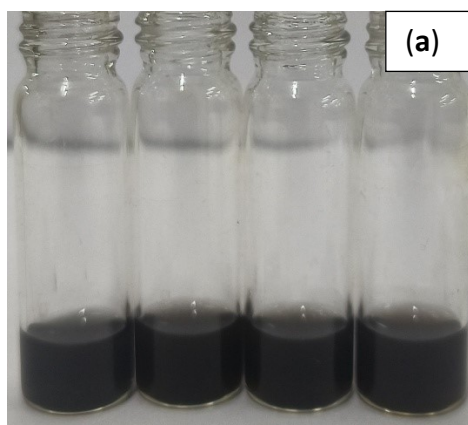

**L1**     **Pb<sup>2+</sup>**     **As<sup>3+</sup>**     **Cd<sup>2+</sup>**

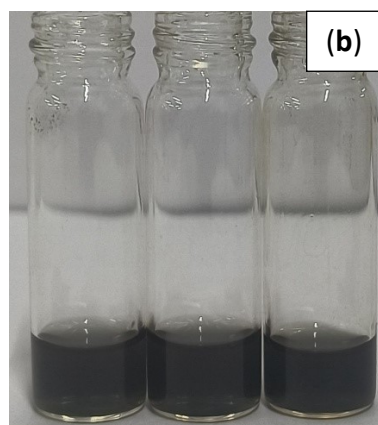

**L1**     **NO<sub>3</sub><sup>-</sup>**     **SO<sub>4</sub><sup>2-</sup>**

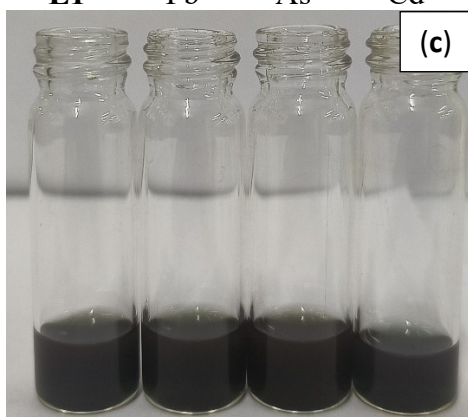

**L2**     **Pb<sup>2+</sup>**     **As<sup>3+</sup>**     **Cd<sup>2+</sup>**

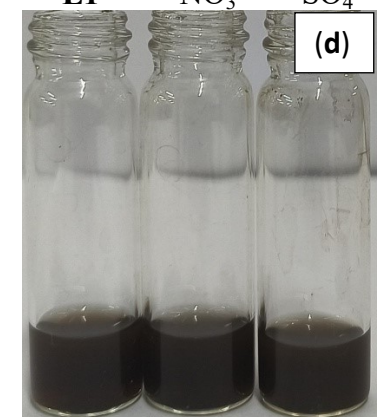

**L2**     **NO<sub>3</sub><sup>-</sup>**     **SO<sub>4</sub><sup>2-</sup>**

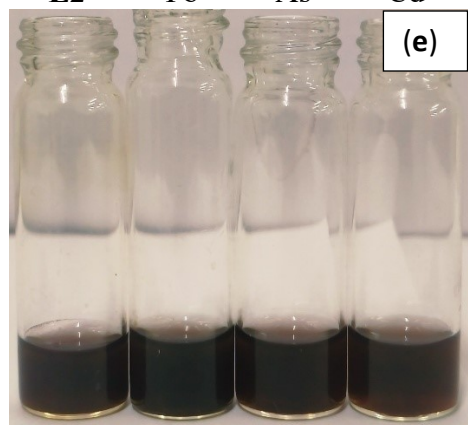

**L3**     **Pb<sup>2+</sup>**     **As<sup>3+</sup>**     **Cd<sup>2+</sup>**

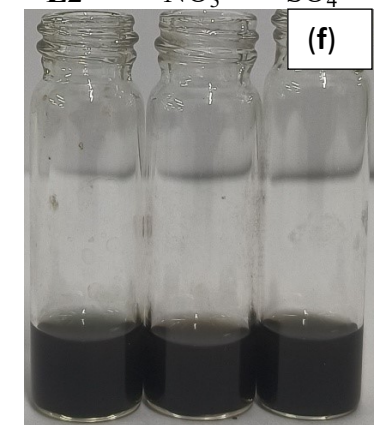

**L3**     **NO<sub>3</sub><sup>-</sup>**     **SO<sub>4</sub><sup>2-</sup>**

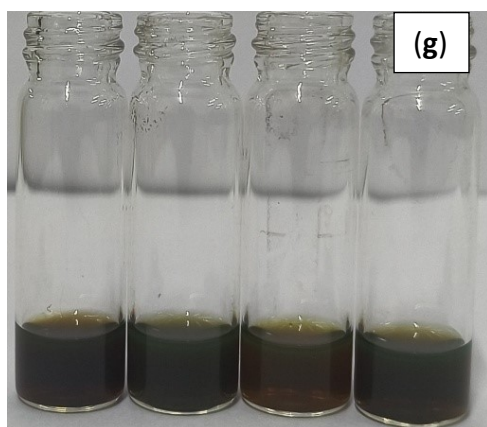

**L4**  $\text{Pb}^{2+}$   $\text{As}^{3+}$   $\text{Cd}^{2+}$

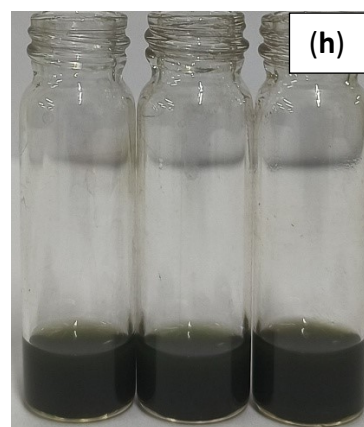

**L4**  $\text{NO}_3^-$   $\text{SO}_4^{2-}$

**Figure S27.** Colorimetric sensing of metal ions with added metal salt  $\{\text{Pb}^{2+}, \text{As}^{3+}, \text{Cd}^{2+}$  (10  $\mu\text{L}$  of 50 mM) $\}$  in the colloidal solution of (a) **L1** capped Ag-NPs; (c) **L2** capped Ag-NPs; (e) **L3** capped Ag-NPs; (g) **L4** capped Ag-NPs; and with added anions  $\{\text{NO}_3^-, \text{SO}_4^{2-}$  (10  $\mu\text{L}$  of 10 mM) $\}$  in the colloidal solution of (b) **L1** capped Ag-NPs; (d) **L2** capped Ag-NPs; (f) **L3** capped Ag-NPs; (h) **L4** capped Ag-NPs.

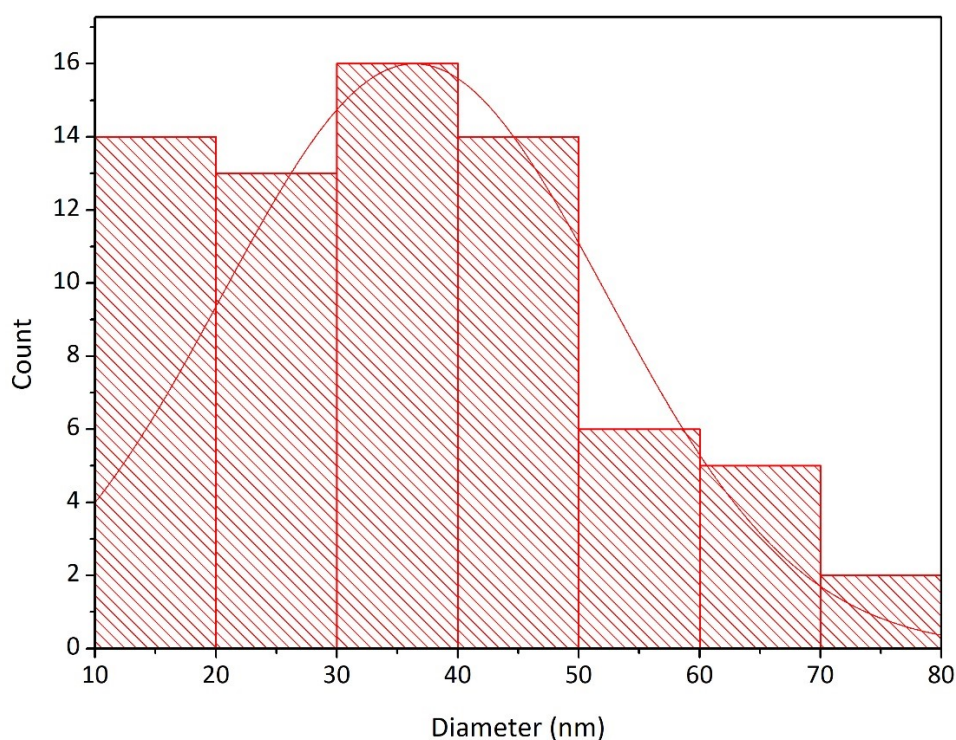

**Figure S28.** Particle size distribution in the case of **L1** stabilized silver nanoparticles after the addition of  $\text{Hg}^{2+}$  ions



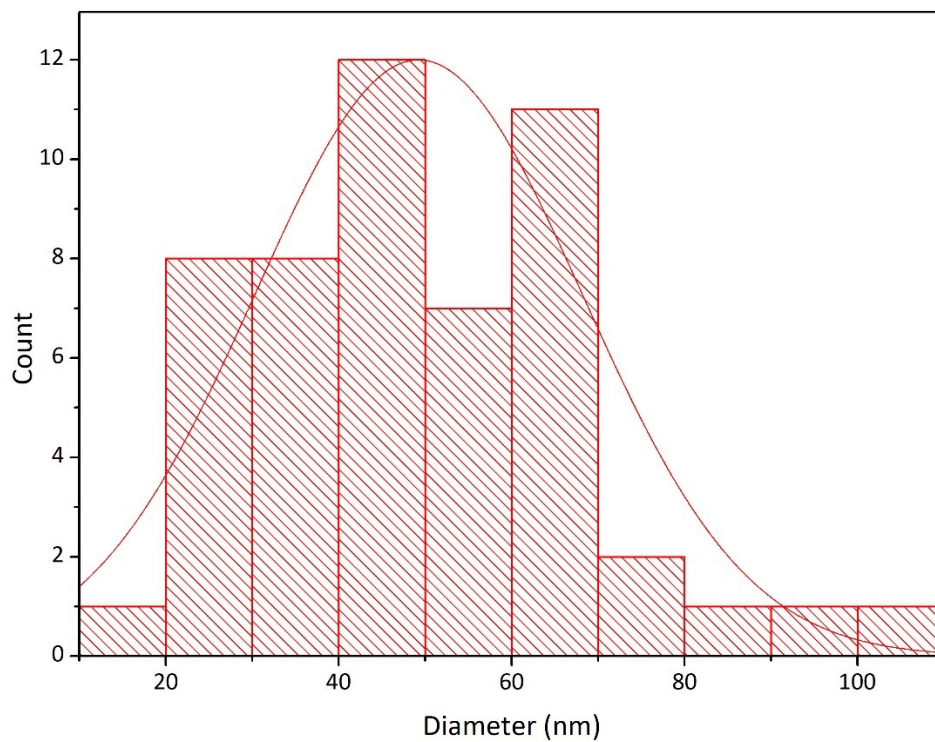

**Figure S29.** Particle size distribution in the case of **L1** stabilized silver nanoparticles after the addition of  $\text{Cl}^-$  ions

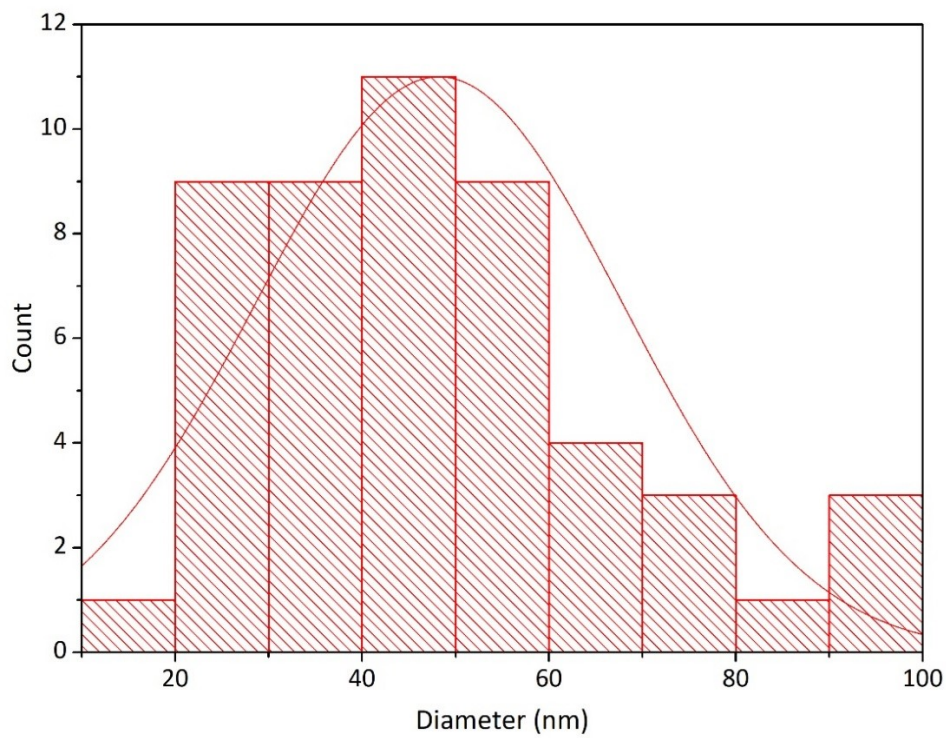

**Figure S30.** Particle size distribution in the case of **L2** stabilized silver nanoparticles after the addition of  $\text{Hg}^{2+}$  ions

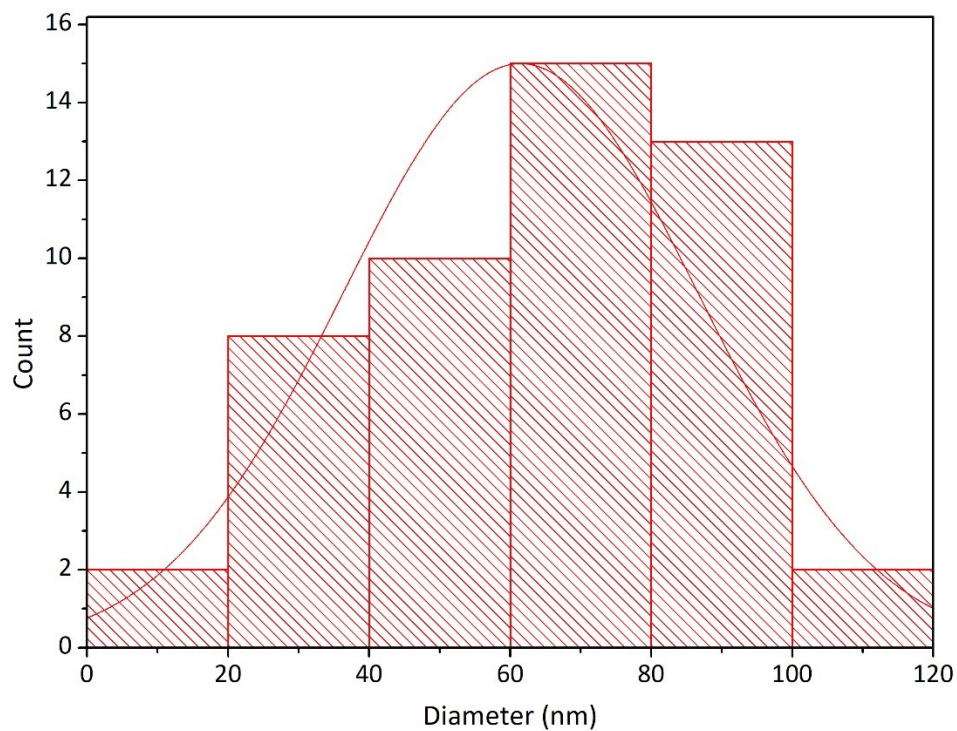

**Figure S31.** Particle size distribution in the case of **L2** stabilized silver nanoparticles after the addition of  $\text{Bi}^{3+}$  ions

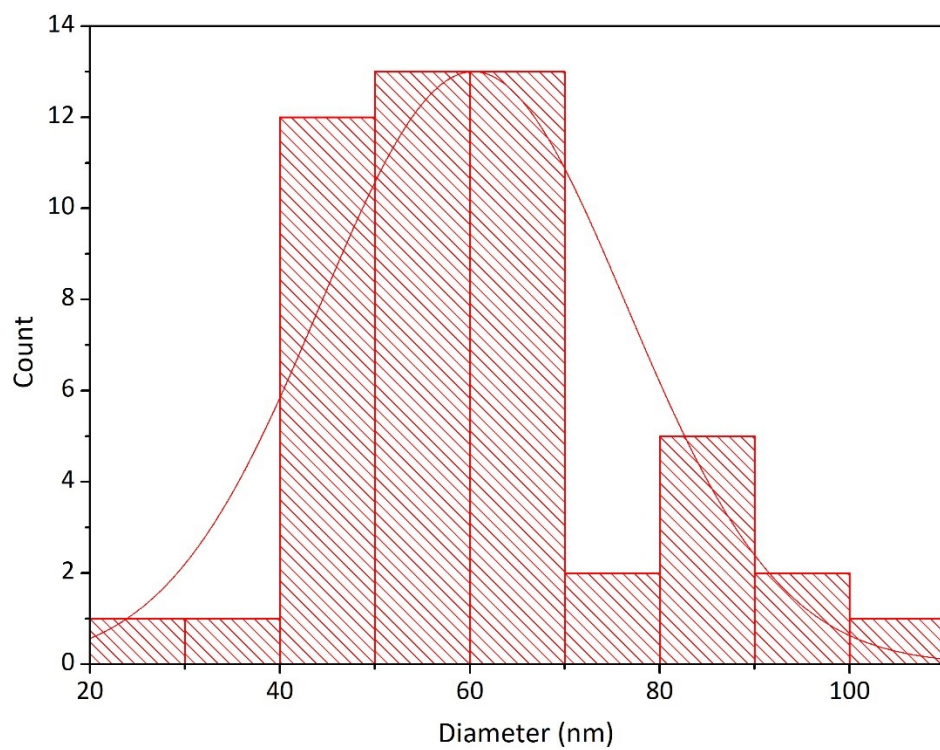

**Figure S32.** Particle size distribution in the case of **L2** stabilized silver nanoparticles after the addition of  $\text{I}^-$  ions



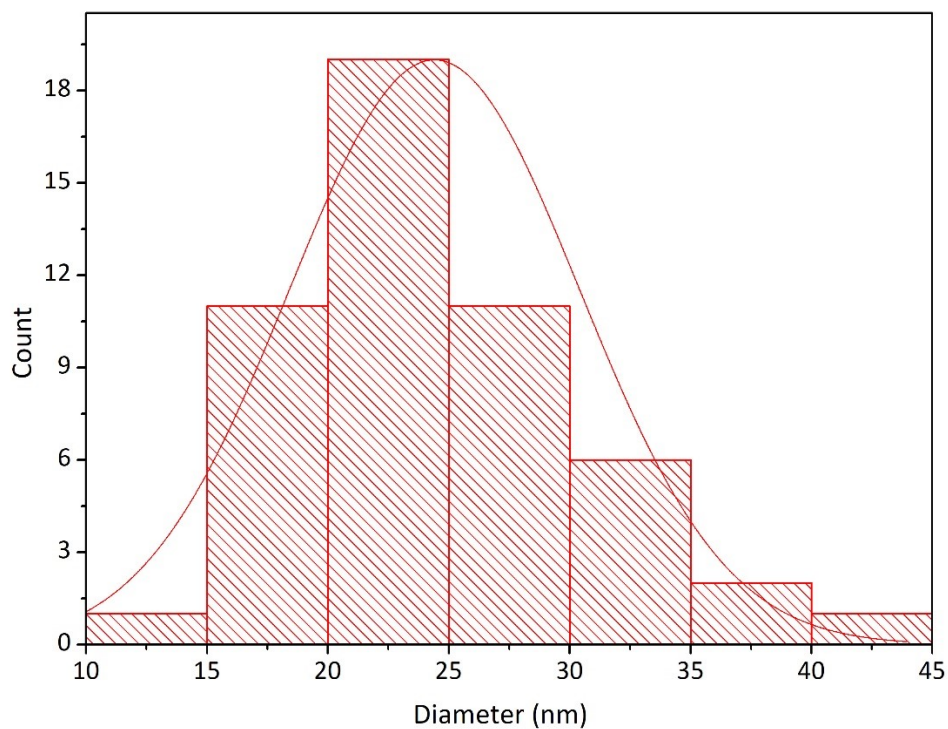

**Figure S33.** Particle size distribution in the case of **L3** stabilized silver nanoparticles after the addition of  $\text{Hg}^{2+}$  ions

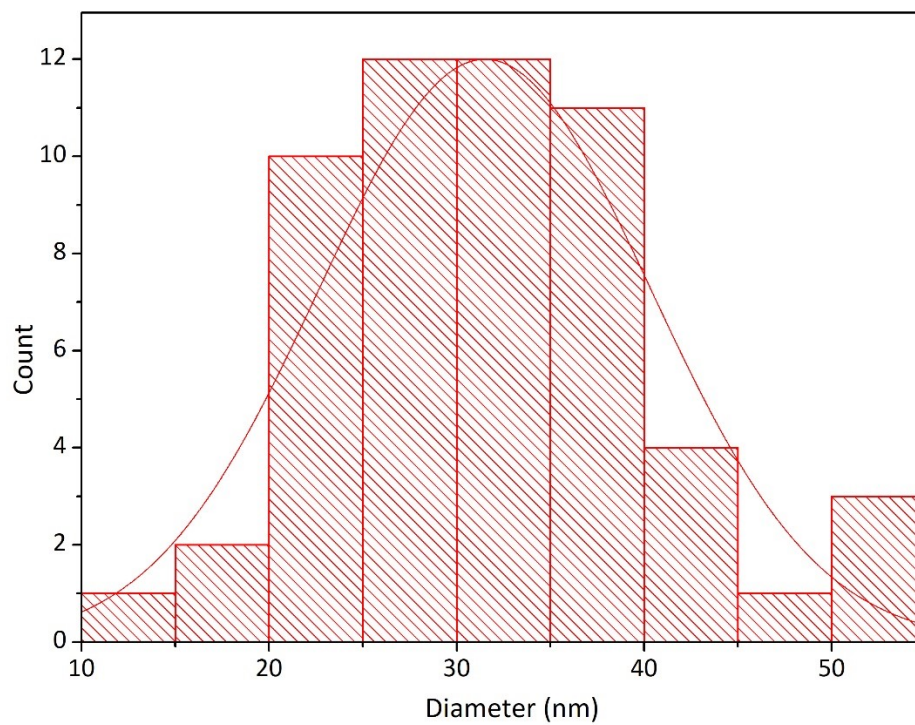

**Figure S34.** Particle size distribution in the case of **L3** stabilized silver nanoparticles after the addition of  $\text{HSO}_4^-$  ions



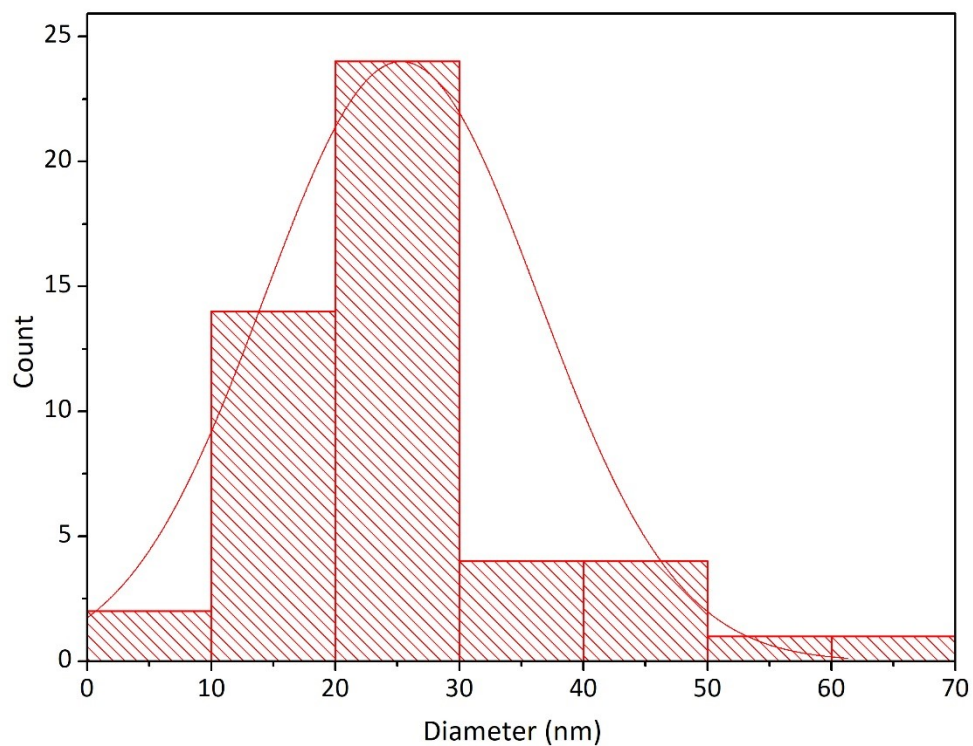

**Figure S35.** Particle size distribution in the case of **L4** stabilized silver nanoparticles after the addition of  $\text{Hg}^{2+}$  ions

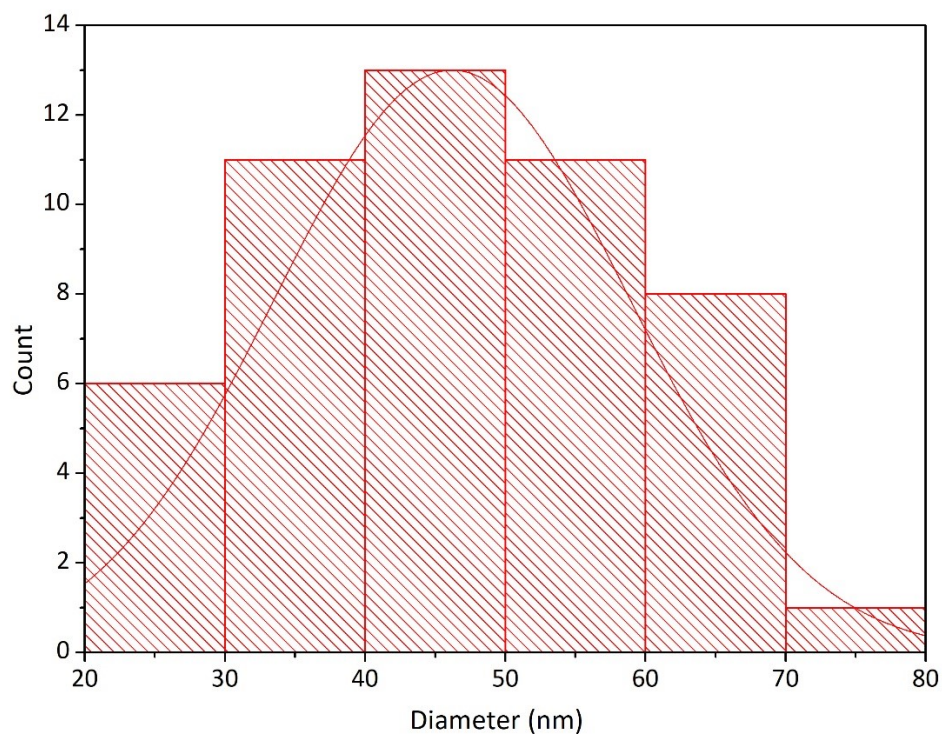

**Figure S36.** Particle size distribution in the case of **L4** stabilized silver nanoparticles after the addition of  $\text{Cr}^{3+}$  ions

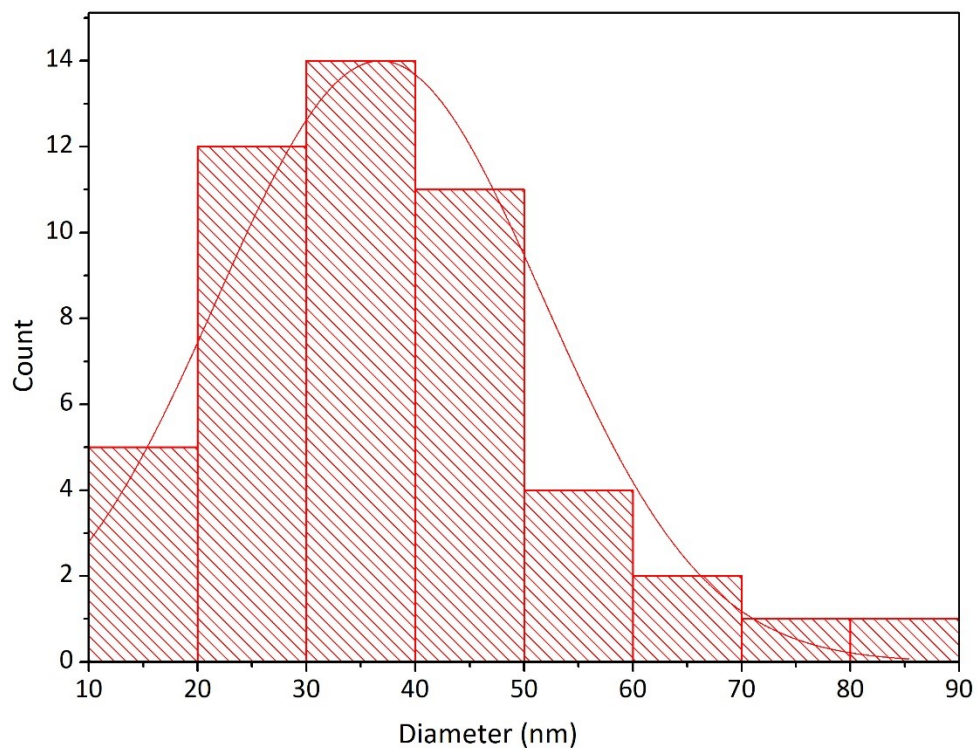

**Figure S37.** Particle size distribution in the case of **L4** stabilized silver nanoparticles after the addition of  $\text{Bi}^{3+}$  ions

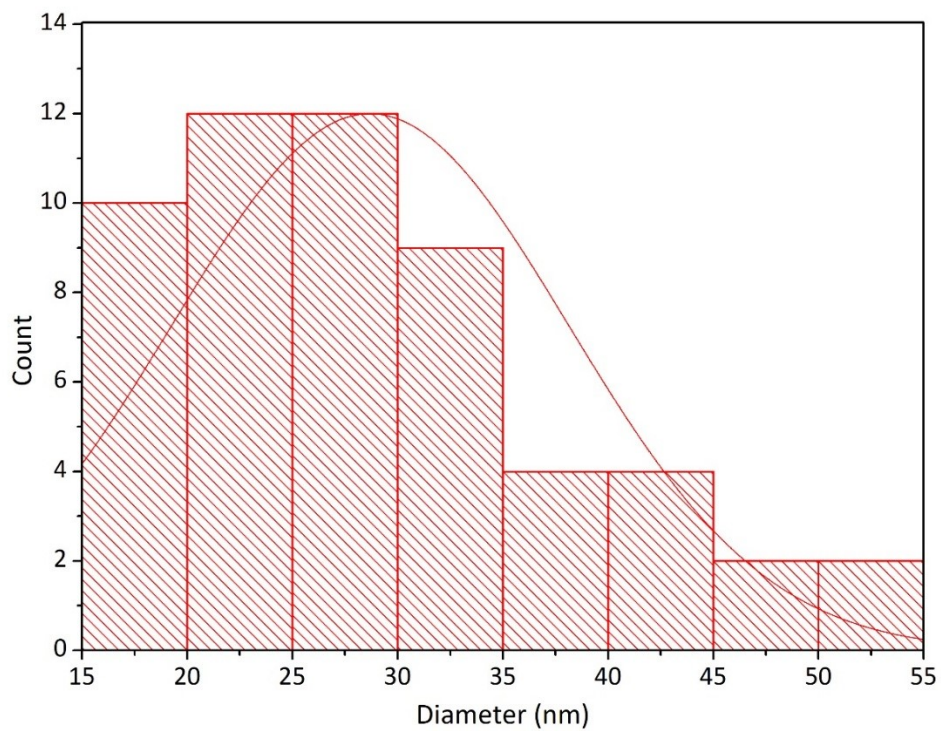

**Figure S38.** Particle size distribution in the case of **L4** stabilized silver nanoparticles after the addition of  $\text{HSO}_4^-$  ions

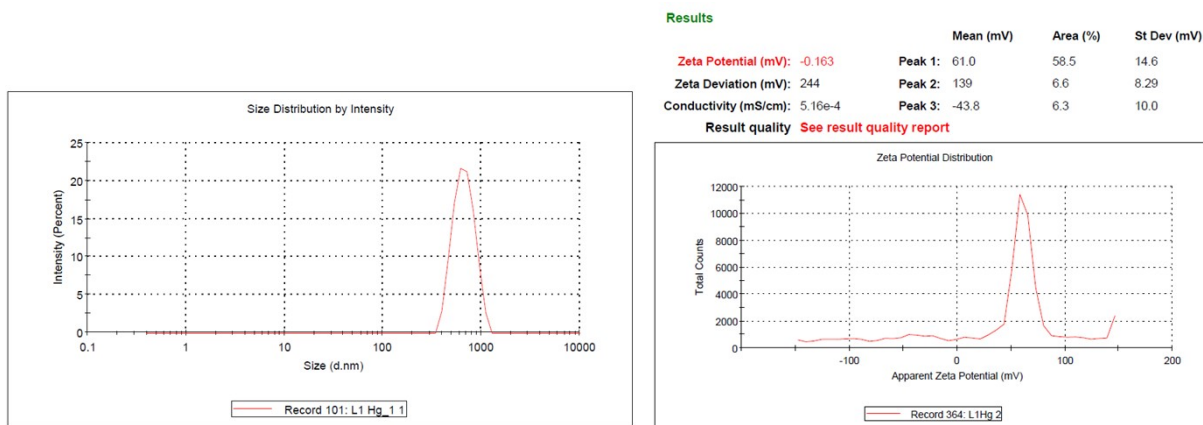

**Figure S39.** DLS data and zeta potential in the case of **L1** stabilized silver nanoparticles after the addition of  $\text{Hg}^{2+}$  ions

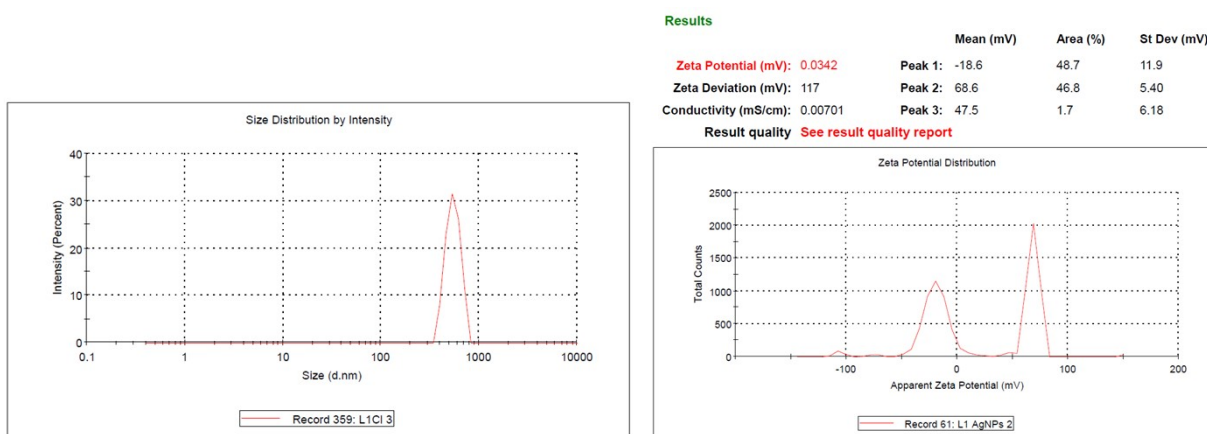

**Figure S40.** DLS data and zeta potential in the case of **L1** stabilized silver nanoparticles after the addition of  $\text{Cl}^-$  ions

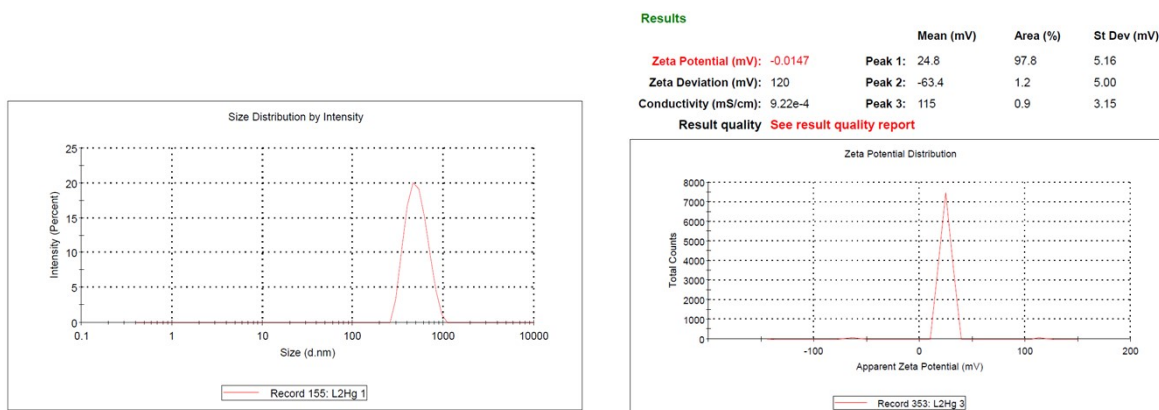

**Figure S41.** DLS data and zeta potential in the case of **L2** stabilized silver nanoparticles after the addition of  $\text{Hg}^{2+}$  ions



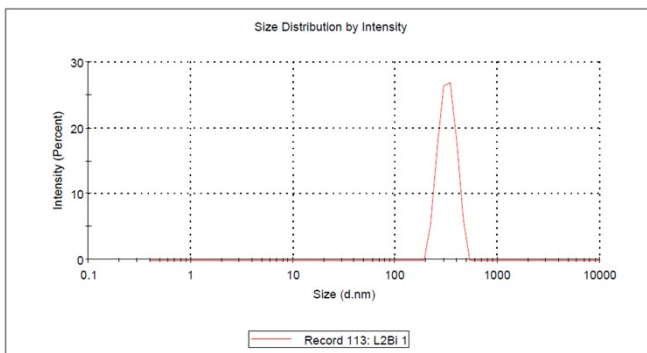

#### Results

|                               | Mean (mV)     | Area (%) | St Dev (mV) |
|-------------------------------|---------------|----------|-------------|
| Zeta Potential (mV): -0.693   | Peak 1: 23.0  | 48.8     | 26.2        |
| Zeta Deviation (mV): 242      | Peak 2: -55.9 | 18.8     | 20.1        |
| Conductivity (mS/cm): 0.00719 | Peak 3: 100   | 14.7     | 16.3        |

Result quality See result quality report

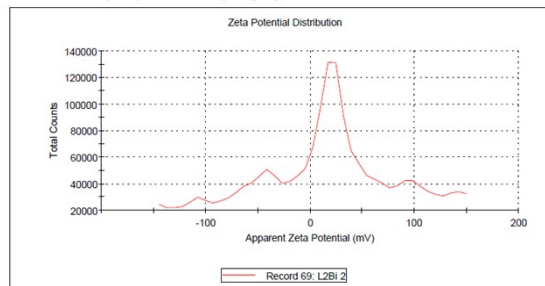

**Figure S42.** DLS data and zeta potential in the case of **L2** stabilized silver nanoparticles after the addition of  $\text{Bi}^{3+}$  ions

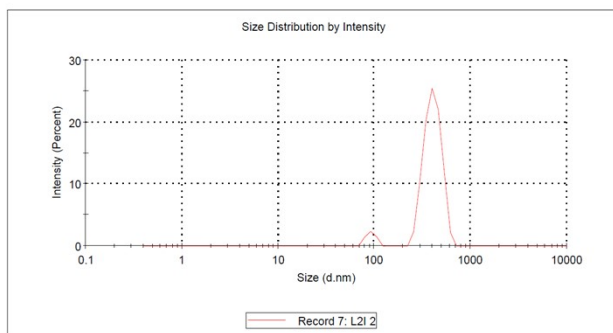

#### Results

|                               | Mean (mV)     | Area (%) | St Dev (mV) |
|-------------------------------|---------------|----------|-------------|
| Zeta Potential (mV): -0.730   | Peak 1: -1.61 | 99.0     | 9.29        |
| Zeta Deviation (mV): 12.8     | Peak 2: 88.4  | 1.0      | 0.00        |
| Conductivity (mS/cm): 2.29e-4 | Peak 3: 0.00  | 0.0      | 0.00        |

Result quality See result quality report

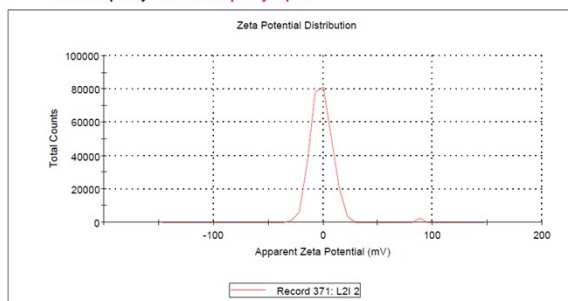

**Figure S43.** DLS data and zeta potential in the case of **L2** stabilized silver nanoparticles after the addition of  $\text{I}^-$  ions

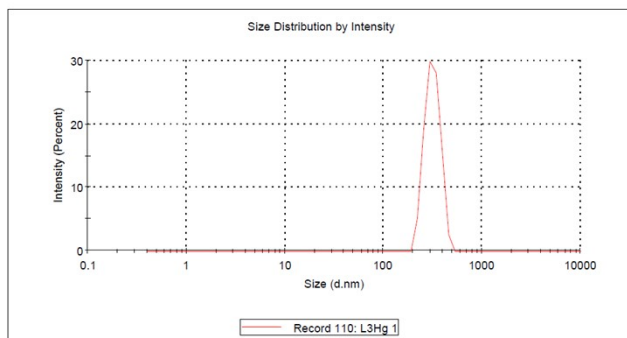

#### Results

|                               | Mean (mV)     | Area (%) | St Dev (mV) |
|-------------------------------|---------------|----------|-------------|
| Zeta Potential (mV): -0.0314  | Peak 1: 102   | 79.6     | 5.15        |
| Zeta Deviation (mV): 245      | Peak 2: 20.6  | 9.8      | 9.71        |
| Conductivity (mS/cm): 8.53e-4 | Peak 3: -6.03 | 7.1      | 8.24        |

Result quality See result quality report

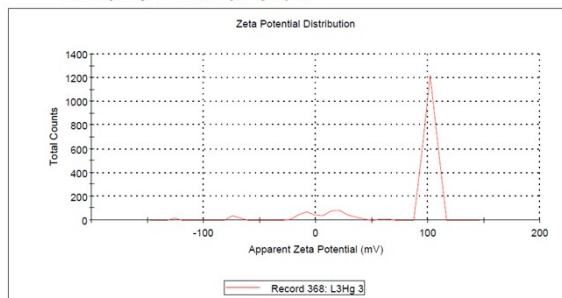

**Figure S44.** DLS data and zeta potential in the case of **L3** stabilized silver nanoparticles after the addition of  $\text{Hg}^{2+}$  ions

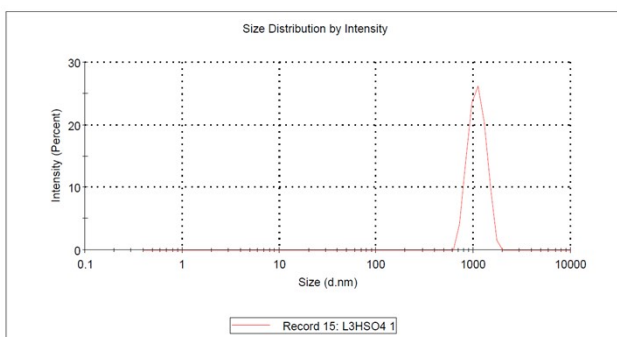

**Results**

|                               | Mean (mV)     | Area (%) | St Dev (mV) |
|-------------------------------|---------------|----------|-------------|
| Zeta Potential (mV): -0.0836  | Peak 1: -4.07 | 95.4     | 9.76        |
| Zeta Deviation (mV): 20.6     | Peak 2: 83.1  | 4.6      | 4.88        |
| Conductivity (mS/cm): 0.00217 | Peak 3: 0.00  | 0.0      | 0.00        |

Result quality [See result quality report](#)

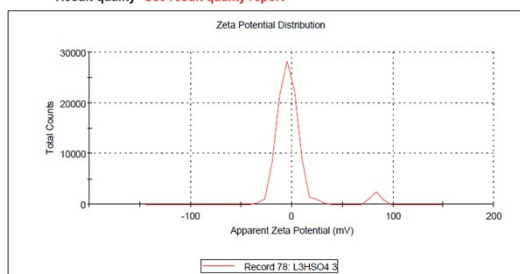

**Figure S45.** DLS data and zeta potential in the case of **L3** stabilized silver nanoparticles after the addition of  $\text{HSO}_4^-$  ions

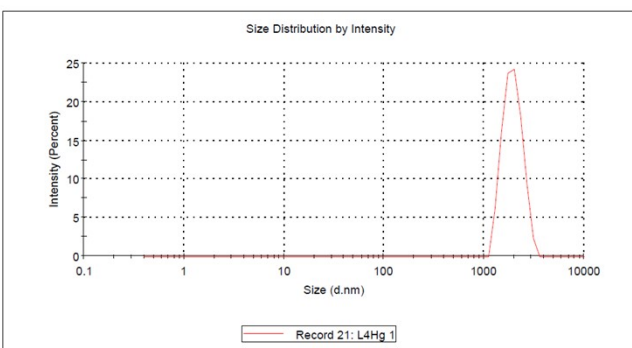

**Results**

|                               | Mean (mV)     | Area (%) | St Dev (mV) |
|-------------------------------|---------------|----------|-------------|
| Zeta Potential (mV): 0.634    | Peak 1: 0.634 | 100.0    | 8.82        |
| Zeta Deviation (mV): 8.82     | Peak 2: 0.00  | 0.0      | 0.00        |
| Conductivity (mS/cm): 0.00616 | Peak 3: 0.00  | 0.0      | 0.00        |

Result quality [See result quality report](#)

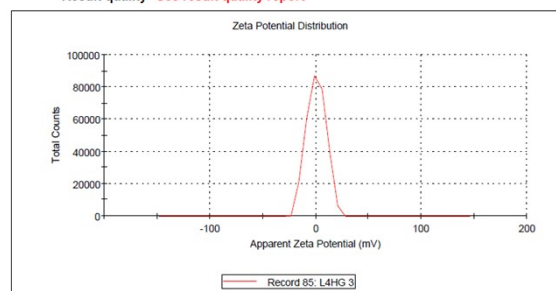

**Figure S46.** DLS data and zeta potential in the case of **L4** stabilized silver nanoparticles after the addition of  $\text{Hg}^{2+}$  ions

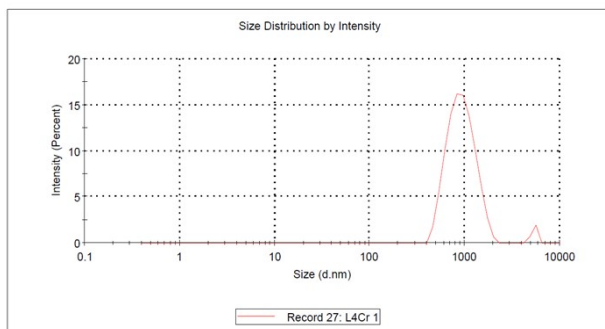

**Results**

|                               | Mean (mV)     | Area (%) | St Dev (mV) |
|-------------------------------|---------------|----------|-------------|
| Zeta Potential (mV): -0.0677  | Peak 1: -20.1 | 76.9     | 8.89        |
| Zeta Deviation (mV): 38.9     | Peak 2: 67.8  | 23.1     | 5.10        |
| Conductivity (mS/cm): 0.00595 | Peak 3: -108  | 0.0      | 0.00        |

Result quality [See result quality report](#)

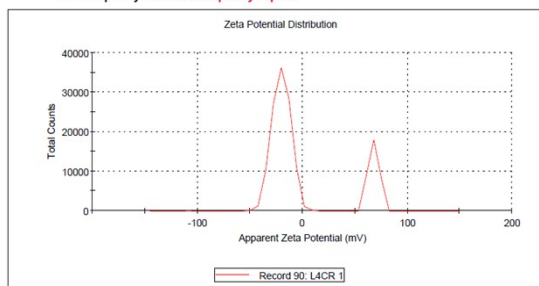

**Figure S47.** DLS data and zeta potential in the case of **L4** stabilized silver nanoparticles after the addition of  $\text{Cr}^{3+}$  ions

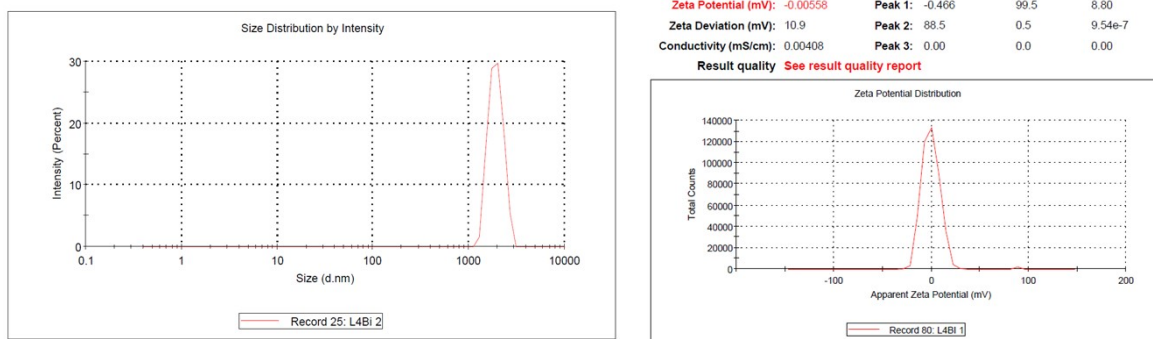

**Figure S48.** DLS data and zeta potential in the case of **L4** stabilized silver nanoparticles after the addition of  $\text{Bi}^{3+}$  ions

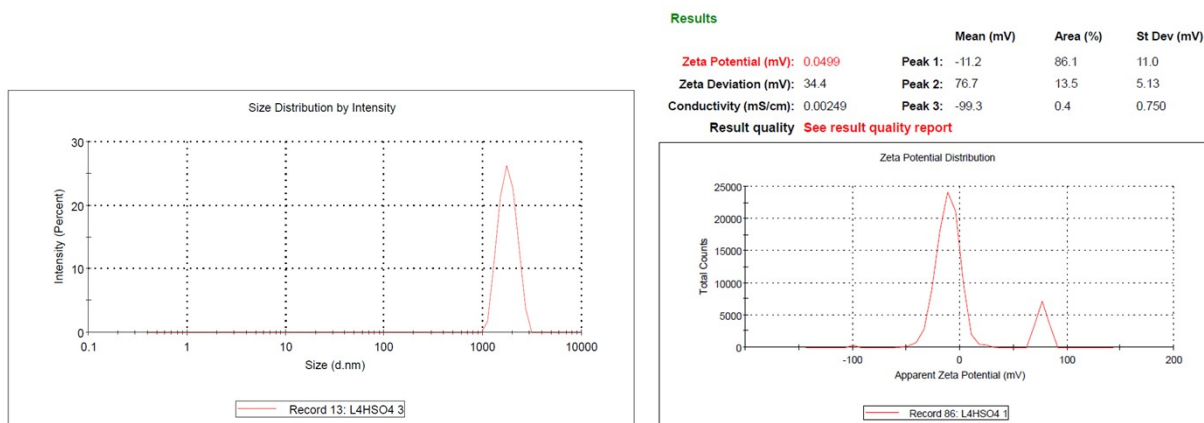

**Figure S49.** DLS data and zeta potential in the case of **L4** stabilized silver nanoparticles after the addition of  $\text{HSO}_4^-$  ions

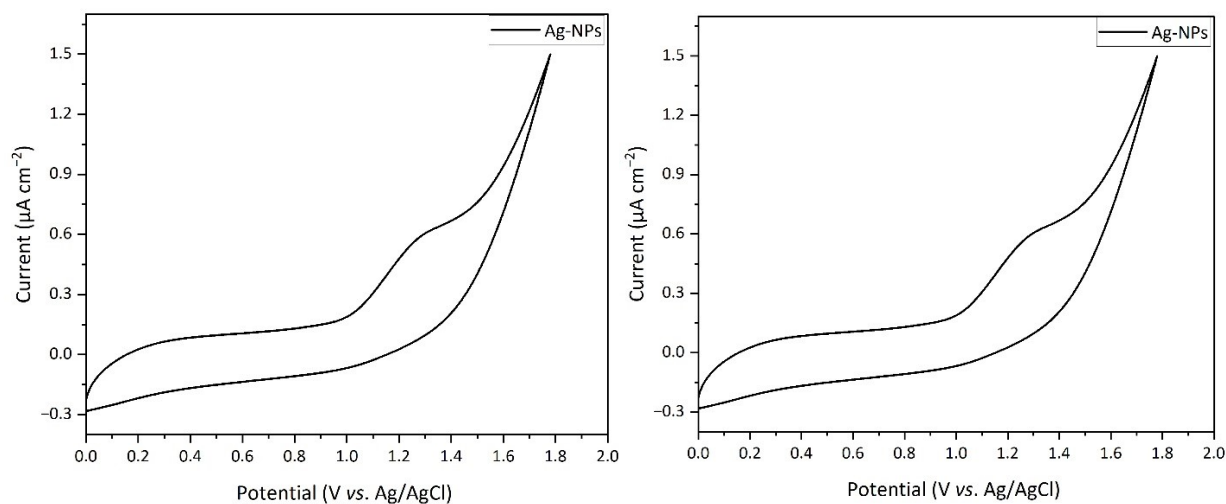

**Figure S50.** (a) Cyclic voltammogram of **L3** stabilized silver nanoparticles; (b) Differential pulse voltammogram of **L3** stabilized silver nanoparticles and with the addition of  $\text{I}^-$  ions

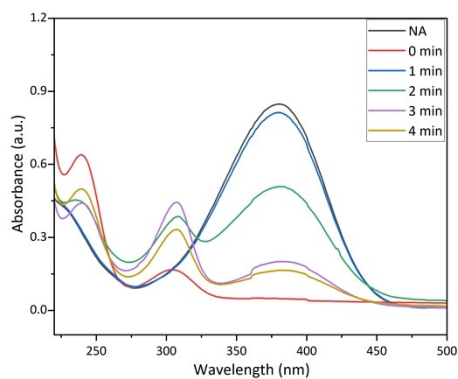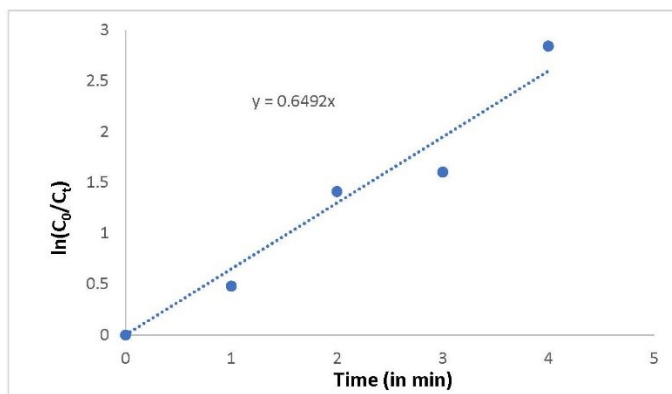

**Figure S51.** UV spectra of reduction of Nitroaniline and rate constant  $\ln C_0/C_t$  Vs time

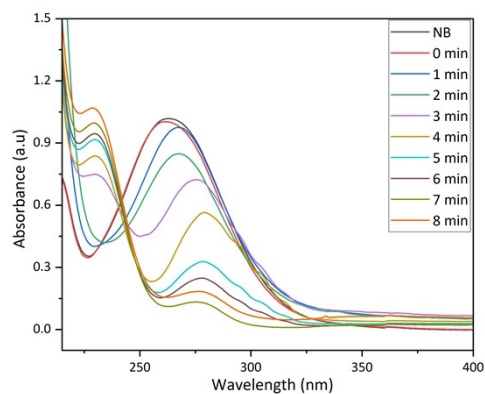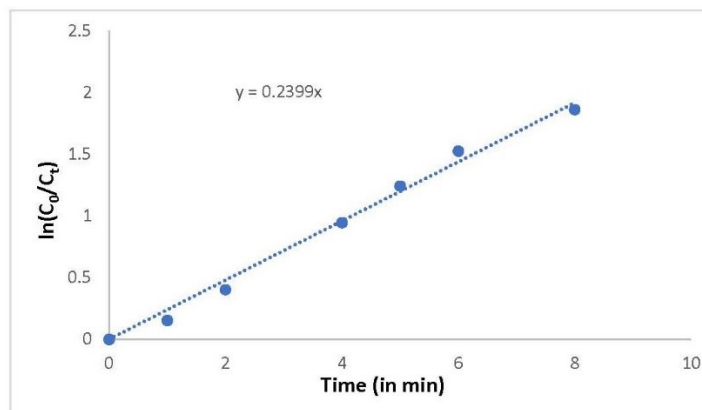

**Figure S52.** UV spectra of reduction of Nitrobenzene and rate constant  $\ln C_0/C_t$  Vs time

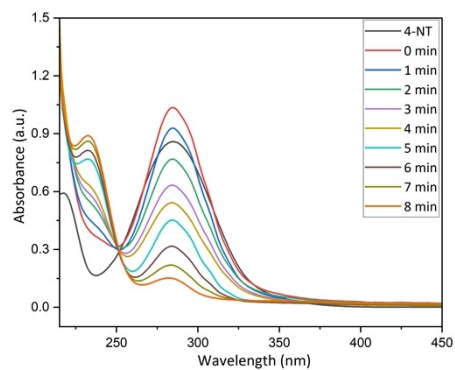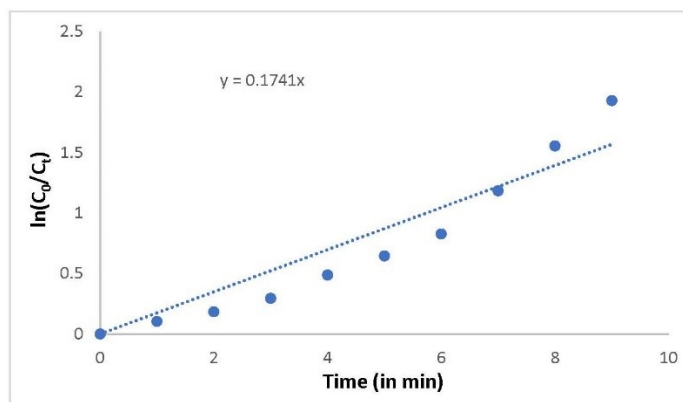

**Figure S53.** UV spectra of reduction of 4-Nitrotoulene and rate constant  $\ln C_0/C_t$  Vs time

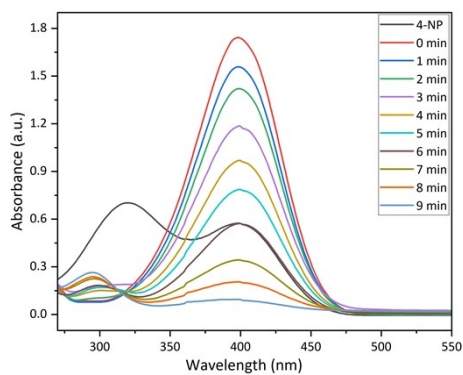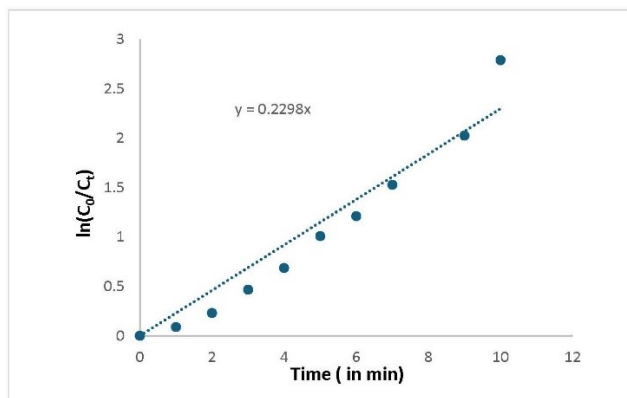

**Figure S54.** UV spectra of reduction of 4-Nitrophenol and rate constant  $\ln C_0/C_t$  Vs time

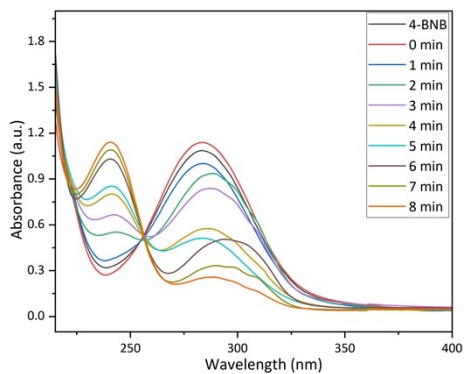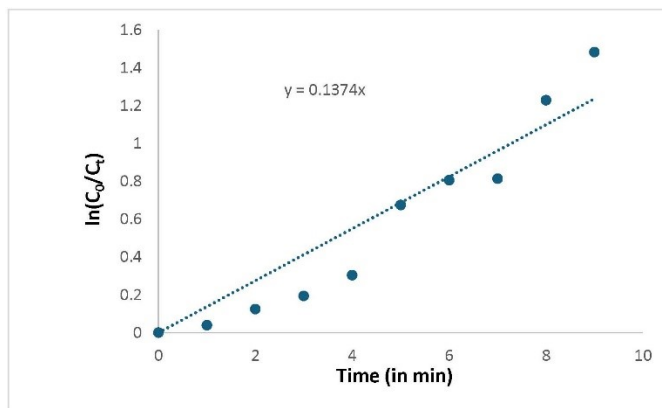

**Figure S55.** UV spectra of reduction of 1-bromo-4-nitrobenzene and rate constant  $\ln C_0/C_t$  Vs time



## Results

|                                     | Mean (mV)            | Area (%) | St Dev (mV) |
|-------------------------------------|----------------------|----------|-------------|
| <b>Zeta Potential (mV): -26.1</b>   | <b>Peak 1: -26.1</b> | 100.0    | 5.64        |
| <b>Zeta Deviation (mV): 5.64</b>    | <b>Peak 2: 0.00</b>  | 0.0      | 0.00        |
| <b>Conductivity (mS/cm): 0.0121</b> | <b>Peak 3: 0.00</b>  | 0.0      | 0.00        |
| <b>Result quality Good</b>          |                      |          |             |

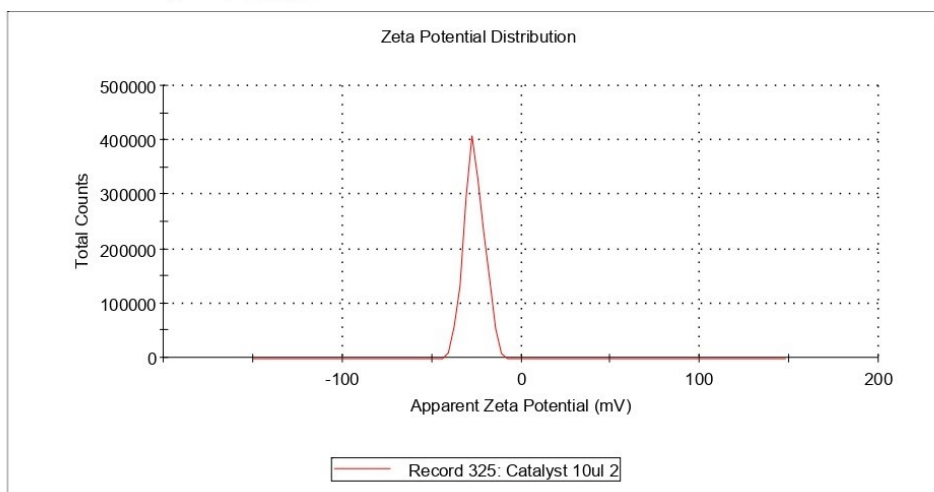

**Figure S56.** Surface charge on the catalyst

## Results

|                                    | Mean (mV)            | Area (%) | St Dev (mV) |
|------------------------------------|----------------------|----------|-------------|
| <b>Zeta Potential (mV): -43.5</b>  | <b>Peak 1: -43.5</b> | 100.0    | 10.2        |
| <b>Zeta Deviation (mV): 10.2</b>   | <b>Peak 2: 0.00</b>  | 0.0      | 0.00        |
| <b>Conductivity (mS/cm): 0.329</b> | <b>Peak 3: 0.00</b>  | 0.0      | 0.00        |
| <b>Result quality Good</b>         |                      |          |             |

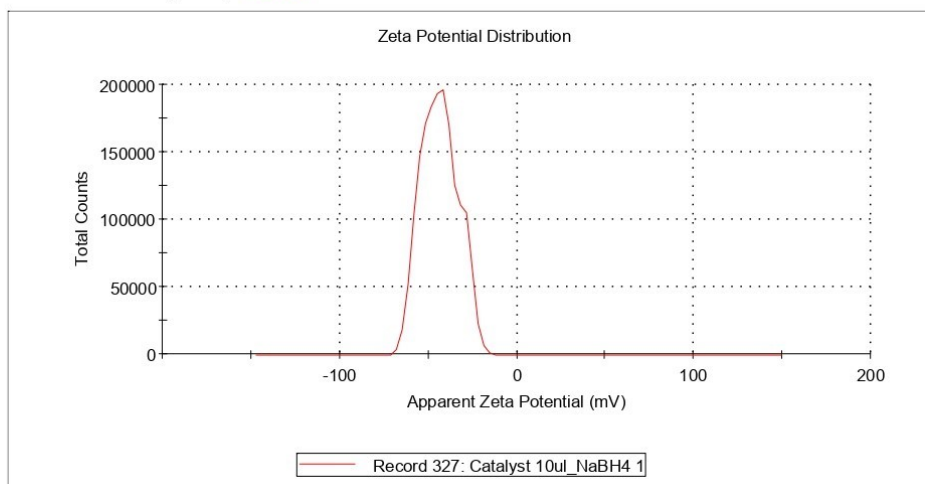

**Figure S57.** Surface charge after the addition of NaBH<sub>4</sub> and 4-nitrophenol in the catalyst solution

## Results

|                                    | Mean (mV)            | Area (%) | St Dev (mV) |
|------------------------------------|----------------------|----------|-------------|
| <b>Zeta Potential (mV): -28.2</b>  | <b>Peak 1: -28.2</b> | 100.0    | 6.29        |
| <b>Zeta Deviation (mV): 6.29</b>   | <b>Peak 2: 0.00</b>  | 0.0      | 0.00        |
| <b>Conductivity (mS/cm): 0.206</b> | <b>Peak 3: 0.00</b>  | 0.0      | 0.00        |
| <b>Result quality Good</b>         |                      |          |             |

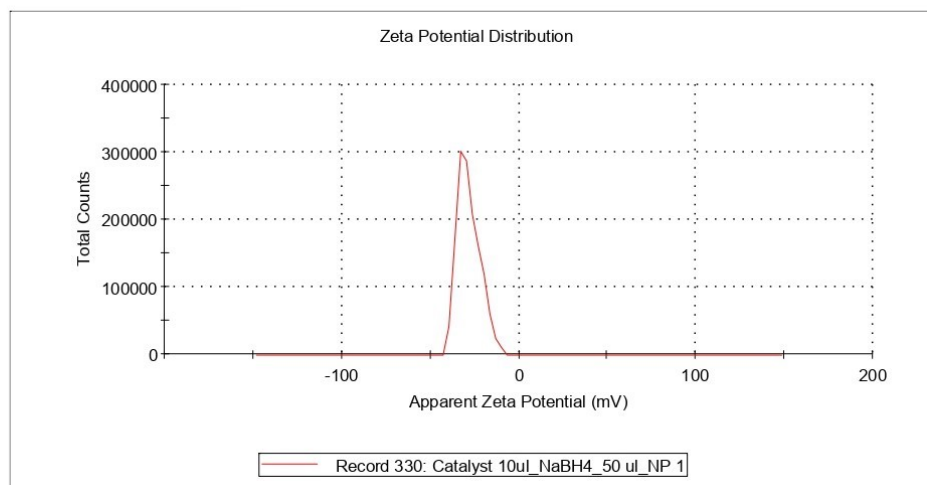

**Figure S58.** Surface charge after completion of reaction

**Table S1.** Ag-NPs synthesized using imine containing small molecules for various applications

| S. No. | Metal precursor and reducing agent    | Imine containing small molecule                                                     | Size of NPs | Application                                                                                | Reference |
|--------|---------------------------------------|-------------------------------------------------------------------------------------|-------------|--------------------------------------------------------------------------------------------|-----------|
| 1.     | AgNO <sub>3</sub> , NaBH <sub>4</sub> | 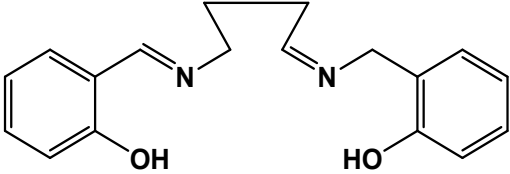   | 29.93 nm    | Detection of toxic metal (Hg <sup>2+</sup> ) and catalytic application of dye degradation. | 1         |
| 2.     | AgNO <sub>3</sub> , NaBH <sub>4</sub> |    | 10 ± 25 nm  | Catalyst to reduce nitroaromatic compounds                                                 | 2         |
| 3.     | AgNO <sub>3</sub> , NaBH <sub>4</sub> |   | 72 nm       | Good antibacterial activity against pathogenic propionic bacteria with comparative studies | 3         |
| 4.     | AgNO <sub>3</sub> , Hydrazine         |  | 12 ± 3.5 nm | Detection of Cu <sup>2+</sup> ions in the absolute ethanol solution                        | 4         |

|    |                                          |                                                                                   |      |                                                                                                                 |   |
|----|------------------------------------------|-----------------------------------------------------------------------------------|------|-----------------------------------------------------------------------------------------------------------------|---|
| 5. | AgNO <sub>3</sub> ,<br>NaBH <sub>4</sub> | 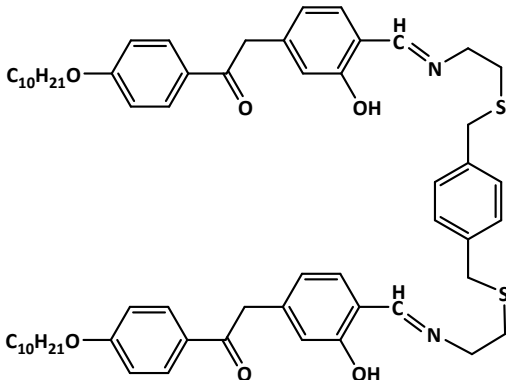 | 5 nm | Colorimetric detection of Hg <sup>2+</sup> and Cu <sup>2+</sup> ions and catalytic reduction of nitroaromatics. | 5 |
|----|------------------------------------------|-----------------------------------------------------------------------------------|------|-----------------------------------------------------------------------------------------------------------------|---|

### References:

1. A. Minhaz, N. Khan and N. Jamila, *Arab J. Chem.*, 2020, **13**, 8898–8908.
2. E. Badr, S. Shafek, H. Hefni, A. Elsharif, A. Alanezi, S. Shaban and D. Kim, *J. Mol. Liq.*, 2021, **326**, 115342.
3. K. Kumar, S. Anand, M. Kori, N. Mishra and S.P. Shrivastava, *J. Indian Chem Soc.*, 2023, **100**, 100965.
4. E. Oliveira, J. Miranda and H. Santos, *Inorganica Chim Acta.*, 2012, **380**, 22-30.
5. N. Yadav, S. Shiva, P. Oswal, A. Kumar, A.K. Singh, B. Singh, B. Pandit, J. Ahmed and G. K. Rao, *J. Mol. Liq.*, 2023, **377**, 121531.
